# Supplementary material for: Linking magnetite in the abdomen of honey bees to a magnetoreceptive function
Source: PubMed Central journal article supplement (PMC5378088; doi:10.1098/rspb.2016.2873), 2017-03-22
Supplement: rspb20162873supp1.pdf [file rspb20162873supp1.pdf]

### Abdomen Pellet # 1

| Applied Magnetic Field<br>(Oe) | Average Magnetic Moment<br>(emu) | standard error<br>(emu) | # outliers<br>(>2 sigma) |
|--------------------------------|----------------------------------|-------------------------|--------------------------|
| 0                              | 2.07E-07                         | 2.34E-08                | 0                        |
| 20                             | -5.06E-07                        | 1.17E-07                | 0                        |
| 40                             | -1.38E-06                        | 9.51E-08                | 0                        |
| 60                             | -5.08E-07                        | 4.86E-06                | 0                        |
| 80                             | -2.88E-06                        | 2.78E-08                | 0                        |
| 100                            | -3.56E-06                        | 3.38E-08                | 0                        |
| 120                            | -4.31E-06                        | 3.80E-08                | 0                        |
| 140                            | -5.13E-06                        | 7.22E-08                | 0                        |
| 160                            | -5.63E-06                        | 1.50E-07                | 0                        |
| 180                            | -6.18E-06                        | 1.07E-07                | 0                        |
| 200                            | -6.92E-06                        | 6.53E-08                | 0                        |
| 220                            | -7.72E-06                        | 6.32E-08                | 0                        |
| 240                            | -8.48E-06                        | 2.57E-08                | 0                        |
| 260                            | -9.01E-06                        | 8.93E-08                | 0                        |
| 280                            | -9.87E-06                        | 8.37E-08                | 0                        |
| 300                            | -1.08E-05                        | 1.23E-07                | 0                        |
| 320                            | -1.11E-05                        | 1.12E-07                | 0                        |
| 340                            | -1.22E-05                        | 1.31E-07                | 0                        |
| 360                            | -1.28E-05                        | 1.50E-07                | 0                        |
| 380                            | -1.39E-05                        | 5.58E-07                | 0                        |
| 400                            | -1.43E-05                        | 5.25E-08                | 0                        |
| 420                            | -1.52E-05                        | 3.31E-08                | 1                        |
| 440                            | -1.60E-05                        | 1.83E-08                | 0                        |
| 460                            | -1.69E-05                        | 6.77E-08                | 0                        |
| 480                            | -1.77E-05                        | 2.81E-08                | 0                        |
| 500                            | -1.84E-05                        | 1.59E-07                | 0                        |
| 520                            | -1.93E-05                        | 6.49E-08                | 0                        |
| 540                            | -1.99E-05                        | 2.31E-07                | 0                        |
| 560                            | -2.13E-05                        | 1.88E-07                | 0                        |
| 580                            | -2.21E-05                        | 1.08E-07                | 0                        |
| 600                            | -2.32E-05                        | 4.76E-08                | 0                        |
| 620                            | -2.42E-05                        | 4.73E-08                | 0                        |
| 640                            | -2.52E-05                        | 8.75E-08                | 0                        |
| 660                            | -2.61E-05                        | 1.93E-07                | 0                        |
| 680                            | -2.71E-05                        | 5.57E-08                | 0                        |
| 700                            | -2.84E-05                        | 1.13E-07                | 0                        |
| 720                            | -2.98E-05                        | 2.77E-07                | 0                        |

|      |           |          |   |
|------|-----------|----------|---|
| 740  | -3.03E-05 | 9.42E-08 | 0 |
| 760  | -3.15E-05 | 9.24E-08 | 0 |
| 780  | -3.26E-05 | 6.31E-08 | 0 |
| 800  | -3.37E-05 | 9.16E-08 | 0 |
| 820  | -3.45E-05 | 1.33E-07 | 0 |
| 840  | -3.58E-05 | 2.03E-07 | 0 |
| 860  | -3.71E-05 | 1.17E-07 | 0 |
| 880  | -3.81E-05 | 4.67E-07 | 0 |
| 900  | -3.94E-05 | 9.80E-08 | 0 |
| 920  | -4.06E-05 | 1.04E-07 | 0 |
| 940  | -4.18E-05 | 1.08E-07 | 0 |
| 960  | -4.31E-05 | 2.06E-07 | 0 |
| 980  | -4.43E-05 | 2.87E-07 | 0 |
| 1000 | -4.53E-05 | 2.94E-07 | 0 |
| 1020 | -4.68E-05 | 2.39E-07 | 0 |
| 1040 | -4.74E-05 | 7.52E-07 | 0 |
| 1060 | -4.89E-05 | 6.32E-07 | 0 |
| 1080 | -5.03E-05 | 3.25E-07 | 0 |
| 1100 | -5.18E-05 | 3.91E-07 | 0 |
| 1120 | -5.31E-05 | 2.04E-07 | 0 |
| 1140 | -5.51E-05 | 3.83E-07 | 0 |
| 1160 | -5.56E-05 | 5.14E-07 | 0 |
| 1180 | -5.79E-05 | 7.30E-07 | 1 |
| 1200 | -5.80E-05 | 9.20E-07 | 0 |
| 1220 | -5.92E-05 | 4.66E-07 | 0 |
| 1240 | -6.10E-05 | 5.53E-07 | 0 |
| 1260 | -6.27E-05 | 5.82E-07 | 0 |
| 1280 | -6.34E-05 | 5.39E-07 | 0 |
| 1300 | -6.66E-05 | 1.26E-06 | 0 |
| 1320 | -6.49E-05 | 1.62E-06 | 0 |
| 1340 | -6.96E-05 | 9.49E-07 | 0 |
| 1360 | -6.85E-05 | 8.64E-07 | 0 |
| 1380 | -7.11E-05 | 1.88E-06 | 0 |
| 1400 | -7.39E-05 | 5.69E-07 | 0 |
| 1420 | -7.40E-05 | 4.76E-07 | 0 |
| 1440 | -7.51E-05 | 3.26E-07 | 0 |
| 1460 | -7.76E-05 | 1.14E-06 | 0 |
| 1480 | -7.85E-05 | 1.81E-06 | 0 |
| 1500 | -8.16E-05 | 1.10E-06 | 0 |
| 1520 | -7.98E-05 | 1.41E-06 | 0 |
| 1540 | -8.48E-05 | 2.58E-06 | 0 |

|      |           |          |   |
|------|-----------|----------|---|
| 1560 | -8.25E-05 | 1.87E-06 | 0 |
| 1580 | -8.72E-05 | 1.72E-06 | 0 |
| 1600 | -8.62E-05 | 7.84E-07 | 0 |
| 1620 | -8.97E-05 | 2.00E-06 | 0 |
| 1640 | -9.04E-05 | 8.19E-07 | 0 |
| 1660 | -9.31E-05 | 2.44E-06 | 0 |
| 1680 | -9.56E-05 | 2.67E-06 | 0 |
| 1700 | -9.46E-05 | 2.84E-06 | 0 |
| 1720 | -9.71E-05 | 2.05E-06 | 0 |
| 1740 | -9.61E-05 | 1.25E-06 | 0 |
| 1760 | -1.01E-04 | 1.39E-06 | 0 |
| 1780 | -1.03E-04 | 1.47E-06 | 0 |
| 1800 | -1.03E-04 | 1.59E-06 | 0 |
| 1820 | -1.05E-04 | 1.32E-06 | 0 |
| 1840 | -1.07E-04 | 2.41E-06 | 0 |
| 1860 | -1.07E-04 | 1.59E-06 | 0 |
| 1880 | -1.12E-04 | 2.15E-06 | 0 |
| 1900 | -1.12E-04 | 1.15E-06 | 0 |
| 1920 | -1.13E-04 | 2.48E-06 | 0 |
| 1940 | -1.14E-04 | 1.76E-06 | 0 |
| 1960 | -1.13E-04 | 2.56E-06 | 0 |
| 1980 | -1.16E-04 | 2.74E-06 | 0 |
| 2000 | -1.20E-04 | 1.40E-05 | 0 |
| 2000 | -1.21E-04 | 1.83E-06 | 0 |
| 1980 | -1.18E-04 | 1.75E-07 | 0 |
| 1960 | -1.16E-04 | 2.23E-07 | 0 |
| 1940 | -1.14E-04 | 1.55E-07 | 0 |
| 1920 | -1.12E-04 | 7.01E-08 | 0 |
| 1900 | -1.11E-04 | 6.87E-08 | 0 |
| 1880 | -1.09E-04 | 4.01E-08 | 0 |
| 1860 | -1.08E-04 | 1.03E-07 | 0 |
| 1840 | -1.06E-04 | 4.94E-08 | 0 |
| 1820 | -1.04E-04 | 1.29E-07 | 0 |
| 1800 | -1.02E-04 | 2.02E-07 | 0 |
| 1780 | -1.01E-04 | 1.64E-07 | 0 |
| 1760 | -9.93E-05 | 8.93E-08 | 0 |
| 1740 | -9.79E-05 | 8.20E-08 | 0 |
| 1720 | -9.61E-05 | 6.26E-08 | 0 |
| 1700 | -9.47E-05 | 5.53E-08 | 0 |
| 1680 | -9.28E-05 | 8.44E-08 | 0 |
| 1660 | -9.14E-05 | 7.36E-08 | 0 |

|      |           |          |   |
|------|-----------|----------|---|
| 1640 | -8.98E-05 | 1.28E-07 | 0 |
| 1620 | -8.79E-05 | 1.22E-07 | 0 |
| 1600 | -8.67E-05 | 8.85E-08 | 0 |
| 1580 | -8.49E-05 | 9.52E-08 | 0 |
| 1560 | -8.35E-05 | 7.07E-08 | 0 |
| 1540 | -8.20E-05 | 5.68E-08 | 0 |
| 1520 | -8.04E-05 | 1.05E-07 | 0 |
| 1500 | -7.87E-05 | 9.33E-08 | 0 |
| 1480 | -7.73E-05 | 1.10E-07 | 0 |
| 1460 | -7.58E-05 | 1.67E-07 | 0 |
| 1440 | -7.43E-05 | 1.36E-07 | 0 |
| 1420 | -7.29E-05 | 6.57E-08 | 0 |
| 1400 | -7.13E-05 | 7.52E-08 | 0 |
| 1380 | -6.97E-05 | 5.10E-08 | 0 |
| 1360 | -6.83E-05 | 4.95E-08 | 0 |
| 1340 | -6.65E-05 | 8.55E-08 | 0 |
| 1320 | -6.53E-05 | 8.60E-08 | 0 |
| 1300 | -6.39E-05 | 2.05E-07 | 0 |
| 1280 | -6.23E-05 | 1.83E-07 | 0 |
| 1260 | -6.09E-05 | 1.08E-07 | 0 |
| 1240 | -5.92E-05 | 8.24E-08 | 0 |
| 1220 | -5.78E-05 | 9.48E-08 | 0 |
| 1200 | -5.64E-05 | 6.77E-08 | 0 |
| 1180 | -5.49E-05 | 7.34E-08 | 0 |
| 1160 | -5.36E-05 | 9.72E-08 | 0 |
| 1140 | -5.21E-05 | 2.09E-07 | 0 |
| 1120 | -5.05E-05 | 1.10E-07 | 0 |
| 1100 | -4.90E-05 | 1.47E-07 | 0 |
| 1080 | -4.76E-05 | 1.28E-07 | 0 |
| 1060 | -4.66E-05 | 5.41E-08 | 0 |
| 1040 | -4.52E-05 | 5.66E-08 | 0 |
| 1020 | -6.08E-05 | 1.71E-05 | 1 |
| 1000 | -4.23E-05 | 1.66E-07 | 0 |
| 980  | -4.09E-05 | 1.33E-07 | 0 |
| 960  | -3.95E-05 | 1.23E-07 | 0 |
| 940  | -3.85E-05 | 2.29E-07 | 0 |
| 920  | -3.69E-05 | 1.79E-07 | 0 |
| 900  | -3.56E-05 | 7.18E-08 | 0 |
| 880  | -3.43E-05 | 1.24E-07 | 0 |
| 860  | -3.28E-05 | 9.90E-08 | 0 |
| 840  | -3.18E-05 | 2.56E-07 | 0 |

|     |           |          |   |
|-----|-----------|----------|---|
| 820 | -3.06E-05 | 2.16E-07 | 0 |
| 800 | -2.92E-05 | 1.59E-07 | 0 |
| 780 | -2.79E-05 | 2.29E-07 | 0 |
| 760 | -2.62E-05 | 8.72E-08 | 0 |
| 740 | -2.52E-05 | 5.92E-07 | 1 |
| 720 | -2.43E-05 | 1.27E-07 | 0 |
| 700 | -2.30E-05 | 1.64E-07 | 0 |
| 680 | -2.22E-05 | 1.89E-07 | 0 |
| 660 | -2.10E-05 | 4.70E-07 | 0 |
| 640 | -1.89E-05 | 2.54E-07 | 0 |
| 620 | -1.84E-05 | 2.82E-07 | 0 |
| 600 | -1.72E-05 | 2.01E-07 | 0 |
| 580 | -1.58E-05 | 1.07E-07 | 0 |
| 560 | -1.51E-05 | 1.43E-07 | 0 |
| 540 | -1.42E-05 | 1.43E-07 | 0 |
| 520 | -1.24E-05 | 2.21E-07 | 0 |
| 500 | -1.16E-05 | 1.87E-07 | 0 |
| 480 | -1.09E-05 | 2.39E-07 | 0 |
| 460 | -9.37E-06 | 4.37E-07 | 0 |
| 440 | -8.34E-06 | 2.98E-07 | 0 |
| 420 | -5.92E-06 | 2.01E-06 | 1 |
| 400 | -6.36E-06 | 2.23E-07 | 0 |
| 380 | -5.66E-06 | 1.31E-07 | 0 |
| 360 | -4.68E-06 | 2.66E-07 | 0 |
| 340 | -3.80E-06 | 4.69E-07 | 0 |
| 320 | -2.68E-06 | 5.61E-07 | 0 |
| 300 | 3.50E-06  | 5.65E-06 | 1 |
| 280 | -1.07E-06 | 1.22E-07 | 0 |
| 260 | -2.13E-07 | 1.79E-07 | 0 |
| 240 | -3.87E-08 | 3.52E-07 | 0 |
| 220 | 6.25E-06  | 4.78E-06 | 1 |
| 200 | 2.14E-06  | 1.30E-07 | 0 |
| 180 | 8.24E-06  | 5.01E-06 | 1 |
| 160 | 3.81E-06  | 4.91E-07 | 0 |
| 140 | 4.30E-06  | 4.28E-07 | 0 |
| 120 | 5.15E-06  | 1.18E-07 | 0 |
| 100 | 5.28E-06  | 6.05E-07 | 0 |
| 80  | 6.20E-06  | 1.68E-07 | 0 |
| 60  | 6.39E-06  | 2.19E-07 | 0 |
| 40  | -1.05E-05 | 1.72E-05 | 1 |
| 20  | 7.56E-06  | 3.37E-07 | 0 |

|      |          |          |   |
|------|----------|----------|---|
| 0    | 7.68E-06 | 1.29E-07 | 0 |
| 0    | 7.98E-06 | 2.51E-07 | 0 |
| -20  | 8.40E-06 | 1.94E-07 | 0 |
| -40  | 8.35E-06 | 1.53E-07 | 0 |
| -60  | 9.19E-06 | 8.34E-08 | 0 |
| -80  | 9.07E-06 | 2.37E-07 | 0 |
| -100 | 9.64E-06 | 4.20E-07 | 0 |
| -120 | 9.70E-06 | 3.10E-07 | 0 |
| -140 | 1.01E-05 | 2.16E-07 | 0 |
| -160 | 1.13E-05 | 3.13E-07 | 0 |
| -180 | 1.08E-05 | 1.02E-07 | 0 |
| -200 | 1.14E-05 | 1.49E-07 | 0 |
| -220 | 1.19E-05 | 9.82E-08 | 0 |
| -240 | 1.24E-05 | 2.23E-07 | 0 |
| -260 | 1.26E-05 | 1.88E-07 | 0 |
| -280 | 1.32E-05 | 4.37E-07 | 0 |
| -300 | 1.44E-05 | 3.72E-07 | 0 |
| -320 | 1.46E-05 | 4.05E-07 | 0 |
| -340 | 1.48E-05 | 1.47E-07 | 0 |
| -360 | 1.55E-05 | 1.53E-07 | 0 |
| -380 | 1.63E-05 | 1.87E-07 | 0 |
| -400 | 1.67E-05 | 2.23E-07 | 0 |
| -420 | 1.71E-05 | 1.00E-07 | 0 |
| -440 | 1.81E-05 | 2.02E-07 | 0 |
| -460 | 1.91E-05 | 2.34E-07 | 0 |
| -480 | 1.95E-05 | 1.07E-07 | 0 |
| -500 | 2.05E-05 | 1.06E-07 | 0 |
| -520 | 2.12E-05 | 8.06E-08 | 0 |
| -540 | 2.21E-05 | 1.41E-07 | 0 |
| -560 | 2.33E-05 | 4.62E-07 | 0 |
| -580 | 2.39E-05 | 3.12E-07 | 0 |
| -600 | 2.52E-05 | 2.57E-07 | 0 |
| -620 | 2.60E-05 | 3.10E-07 | 0 |
| -640 | 2.66E-05 | 1.19E-07 | 0 |
| -660 | 2.77E-05 | 1.09E-07 | 0 |
| -680 | 2.81E-05 | 1.75E-07 | 0 |
| -700 | 2.95E-05 | 2.17E-07 | 0 |
| -720 | 3.02E-05 | 3.74E-07 | 0 |
| -740 | 3.16E-05 | 2.37E-07 | 0 |
| -760 | 3.20E-05 | 2.83E-07 | 0 |
| -780 | 3.33E-05 | 1.47E-07 | 0 |

|       |          |          |   |
|-------|----------|----------|---|
| -800  | 3.44E-05 | 2.32E-07 | 0 |
| -820  | 3.54E-05 | 2.19E-07 | 0 |
| -840  | 3.64E-05 | 6.36E-07 | 0 |
| -860  | 3.69E-05 | 5.71E-07 | 0 |
| -880  | 3.97E-05 | 7.38E-07 | 0 |
| -900  | 3.96E-05 | 3.88E-07 | 0 |
| -920  | 4.06E-05 | 2.80E-07 | 0 |
| -940  | 4.22E-05 | 2.83E-07 | 0 |
| -960  | 4.31E-05 | 7.38E-07 | 1 |
| -980  | 4.50E-05 | 8.72E-07 | 0 |
| -1000 | 4.63E-05 | 1.14E-06 | 0 |
| -1020 | 4.75E-05 | 9.05E-07 | 0 |
| -1040 | 4.97E-05 | 1.01E-06 | 0 |
| -1060 | 5.24E-05 | 7.42E-07 | 0 |
| -1080 | 5.02E-05 | 9.90E-07 | 0 |
| -1100 | 5.27E-05 | 1.45E-06 | 0 |
| -1120 | 5.62E-05 | 1.45E-06 | 0 |
| -1140 | 5.70E-05 | 3.61E-06 | 0 |
| -1160 | 5.63E-05 | 1.79E-06 | 0 |
| -1180 | 5.55E-05 | 1.75E-06 | 0 |
| -1200 | 5.88E-05 | 1.09E-06 | 0 |
| -1220 | 6.06E-05 | 1.34E-06 | 0 |
| -1240 | 5.66E-05 | 2.40E-06 | 0 |
| -1260 | 7.26E-05 | 3.35E-06 | 0 |
| -1280 | 5.82E-05 | 3.12E-06 | 0 |
| -1300 | 6.89E-05 | 3.66E-06 | 0 |
| -1320 | 6.49E-05 | 3.21E-06 | 0 |
| -1340 | 6.21E-05 | 3.89E-06 | 0 |
| -1360 | 6.49E-05 | 3.77E-06 | 0 |
| -1380 | 7.01E-05 | 2.37E-06 | 0 |
| -1400 | 7.60E-05 | 5.96E-06 | 0 |
| -1420 | 7.72E-05 | 7.78E-06 | 0 |
| -1440 | 7.90E-05 | 4.54E-06 | 0 |
| -1460 | 7.02E-05 | 1.04E-05 | 0 |
| -1480 | 7.49E-05 | 7.24E-06 | 0 |
| -1500 | 8.22E-05 | 2.60E-06 | 0 |
| -1520 | 7.93E-05 | 3.48E-06 | 0 |
| -1540 | 8.36E-05 | 4.71E-06 | 0 |
| -1560 | 6.01E-05 | 2.50E-05 | 0 |
| -1580 | 9.03E-05 | 3.84E-06 | 0 |
| -1600 | 7.60E-05 | 4.87E-06 | 0 |

|       |          |          |   |
|-------|----------|----------|---|
| -1620 | 9.16E-05 | 7.41E-06 | 0 |
| -1640 | 8.99E-05 | 2.45E-06 | 0 |
| -1660 | 8.95E-05 | 3.32E-07 | 0 |
| -1680 | 8.71E-05 | 3.28E-06 | 0 |
| -1700 | 8.07E-05 | 4.83E-06 | 0 |
| -1720 | 9.65E-05 | 9.19E-06 | 0 |
| -1740 | 9.25E-05 | 1.08E-05 | 0 |
| -1760 | 9.87E-05 | 9.92E-07 | 0 |
| -1780 | 9.61E-05 | 2.27E-06 | 0 |
| -1800 | 1.02E-04 | 5.06E-06 | 0 |
| -1820 | 1.31E-04 | 8.57E-06 | 0 |
| -1840 | 1.04E-04 | 9.20E-06 | 0 |
| -1860 | 1.24E-04 | 4.11E-06 | 0 |
| -1880 | 1.11E-04 | 2.65E-06 | 0 |
| -1900 | 1.12E-04 | 2.42E-06 | 0 |
| -1920 | 1.06E-04 | 2.74E-06 | 0 |
| -1940 | 1.10E-04 | 4.76E-06 | 0 |
| -1960 | 1.23E-04 | 9.29E-06 | 0 |
| -1980 | 1.21E-04 | 6.87E-06 | 0 |
| -2000 | 1.15E-04 | 4.78E-06 | 0 |
| -2000 | 1.21E-04 | 7.25E-06 | 0 |
| -1980 | 1.17E-04 | 9.60E-08 | 0 |
| -1960 | 1.15E-04 | 1.20E-07 | 0 |
| -1940 | 1.14E-04 | 6.03E-08 | 0 |
| -1920 | 1.12E-04 | 7.34E-08 | 0 |
| -1900 | 1.10E-04 | 4.84E-08 | 0 |
| -1880 | 1.09E-04 | 3.41E-08 | 0 |
| -1860 | 1.07E-04 | 1.66E-07 | 0 |
| -1840 | 1.06E-04 | 1.48E-07 | 0 |
| -1820 | 1.04E-04 | 1.92E-07 | 0 |
| -1800 | 1.02E-04 | 5.14E-08 | 0 |
| -1780 | 1.01E-04 | 1.08E-07 | 0 |
| -1760 | 9.89E-05 | 4.41E-08 | 0 |
| -1740 | 9.74E-05 | 4.80E-08 | 0 |
| -1720 | 9.57E-05 | 9.16E-08 | 0 |
| -1700 | 9.40E-05 | 1.41E-07 | 0 |
| -1680 | 9.27E-05 | 1.44E-07 | 0 |
| -1660 | 9.10E-05 | 6.68E-08 | 0 |
| -1640 | 8.92E-05 | 6.85E-08 | 0 |
| -1620 | 8.78E-05 | 3.43E-08 | 0 |
| -1600 | 8.63E-05 | 8.40E-08 | 0 |



|       |          |          |   |
|-------|----------|----------|---|
| -1580 | 8.46E-05 | 5.96E-08 | 0 |
| -1560 | 8.33E-05 | 3.25E-08 | 0 |
| -1540 | 8.14E-05 | 1.46E-07 | 0 |
| -1520 | 8.00E-05 | 1.44E-07 | 0 |
| -1500 | 7.86E-05 | 1.53E-07 | 0 |
| -1480 | 7.71E-05 | 9.56E-08 | 0 |
| -1460 | 7.56E-05 | 7.34E-08 | 0 |
| -1440 | 7.37E-05 | 6.55E-08 | 0 |
| -1420 | 7.24E-05 | 1.08E-07 | 0 |
| -1400 | 7.08E-05 | 2.34E-08 | 0 |
| -1380 | 6.93E-05 | 6.12E-08 | 0 |
| -1360 | 6.76E-05 | 9.93E-08 | 0 |
| -1340 | 6.66E-05 | 1.03E-07 | 0 |
| -1320 | 6.49E-05 | 1.13E-07 | 0 |
| -1300 | 6.33E-05 | 1.42E-07 | 0 |
| -1280 | 6.19E-05 | 1.22E-07 | 0 |
| -1260 | 6.04E-05 | 5.36E-08 | 0 |
| -1240 | 5.90E-05 | 4.88E-08 | 0 |
| -1220 | 5.76E-05 | 1.34E-07 | 0 |
| -1200 | 5.62E-05 | 1.64E-07 | 0 |
| -1180 | 5.47E-05 | 2.08E-07 | 0 |
| -1160 | 5.32E-05 | 1.72E-07 | 0 |
| -1140 | 5.15E-05 | 1.23E-07 | 0 |
| -1120 | 5.05E-05 | 3.51E-08 | 0 |
| -1100 | 4.90E-05 | 2.87E-08 | 0 |
| -1080 | 4.76E-05 | 8.05E-08 | 0 |
| -1060 | 4.62E-05 | 1.02E-07 | 0 |
| -1040 | 4.51E-05 | 1.05E-07 | 0 |
| -1020 | 4.35E-05 | 1.43E-07 | 0 |
| -1000 | 4.22E-05 | 2.45E-07 | 0 |
| -980  | 4.06E-05 | 2.19E-07 | 0 |
| -960  | 3.93E-05 | 8.56E-08 | 0 |
| -940  | 3.82E-05 | 1.02E-07 | 0 |
| -920  | 3.68E-05 | 1.36E-07 | 0 |
| -900  | 3.55E-05 | 5.67E-08 | 0 |
| -880  | 3.40E-05 | 1.66E-07 | 0 |
| -860  | 3.28E-05 | 1.70E-07 | 0 |
| -840  | 3.18E-05 | 1.62E-07 | 0 |
| -820  | 3.02E-05 | 1.81E-07 | 0 |
| -800  | 2.93E-05 | 3.06E-07 | 0 |
| -780  | 2.79E-05 | 1.14E-07 | 0 |

|      |           |          |   |
|------|-----------|----------|---|
| -760 | 2.64E-05  | 1.36E-07 | 0 |
| -740 | 2.54E-05  | 1.89E-07 | 0 |
| -720 | 2.40E-05  | 2.52E-07 | 0 |
| -700 | 2.28E-05  | 1.75E-07 | 0 |
| -680 | 3.11E-06  | 1.89E-05 | 1 |
| -660 | 1.94E-05  | 3.64E-07 | 0 |
| -640 | 1.96E-05  | 1.79E-07 | 0 |
| -620 | 1.83E-05  | 1.97E-07 | 0 |
| -600 | 1.75E-05  | 1.63E-07 | 0 |
| -580 | 1.65E-05  | 2.78E-07 | 0 |
| -560 | 1.48E-05  | 2.73E-07 | 0 |
| -540 | 1.37E-05  | 2.12E-07 | 0 |
| -520 | 1.32E-05  | 4.34E-07 | 0 |
| -500 | 1.14E-05  | 2.61E-07 | 0 |
| -480 | 1.11E-05  | 2.27E-07 | 0 |
| -460 | 9.35E-06  | 1.52E-07 | 0 |
| -440 | 8.62E-06  | 2.05E-07 | 0 |
| -420 | 7.77E-06  | 2.83E-07 | 0 |
| -400 | 6.50E-06  | 3.32E-07 | 0 |
| -380 | 5.31E-06  | 2.66E-07 | 0 |
| -360 | 4.87E-06  | 6.63E-07 | 0 |
| -340 | 3.98E-06  | 7.61E-08 | 0 |
| -320 | 3.16E-06  | 1.48E-07 | 0 |
| -300 | 1.92E-06  | 2.21E-07 | 0 |
| -280 | 1.56E-06  | 1.61E-07 | 0 |
| -260 | -1.06E-07 | 7.21E-07 | 0 |
| -240 | -6.74E-07 | 3.37E-07 | 0 |
| -220 | -1.44E-06 | 2.49E-07 | 0 |
| -200 | -2.80E-06 | 5.10E-07 | 0 |
| -180 | -1.71E-06 | 8.03E-07 | 1 |
| -160 | -3.64E-06 | 1.97E-07 | 0 |
| -140 | -4.38E-06 | 1.61E-07 | 0 |
| -120 | -4.69E-06 | 1.52E-07 | 0 |
| -100 | -5.20E-06 | 3.42E-07 | 0 |
| -80  | -5.91E-06 | 1.05E-07 | 0 |
| -60  | -4.38E-06 | 1.93E-06 | 0 |
| -40  | -6.42E-06 | 7.03E-07 | 0 |
| -20  | -7.36E-06 | 1.34E-07 | 0 |
| 0    | -7.80E-06 | 1.03E-07 | 0 |
| 0    | -7.91E-06 | 6.82E-08 | 0 |
| 20   | -8.12E-06 | 1.38E-07 | 0 |

|     |           |          |   |
|-----|-----------|----------|---|
| 40  | -8.41E-06 | 2.51E-07 | 0 |
| 60  | -2.65E-05 | 1.77E-05 | 1 |
| 80  | -8.63E-06 | 2.25E-07 | 0 |
| 100 | -9.26E-06 | 7.22E-08 | 0 |
| 120 | -9.75E-06 | 1.28E-07 | 0 |
| 140 | -1.01E-05 | 1.31E-07 | 0 |
| 160 | -1.02E-05 | 1.44E-07 | 0 |
| 180 | -1.08E-05 | 2.01E-07 | 0 |
| 200 | -1.14E-05 | 3.46E-07 | 0 |
| 220 | -1.15E-05 | 7.74E-07 | 0 |
| 240 | -1.24E-05 | 1.86E-07 | 0 |
| 260 | -1.25E-05 | 8.54E-08 | 0 |
| 280 | -1.29E-05 | 2.05E-07 | 0 |
| 300 | -1.35E-05 | 1.07E-07 | 0 |
| 320 | -1.42E-05 | 1.08E-07 | 0 |
| 340 | -1.49E-05 | 1.66E-07 | 0 |
| 360 | -1.53E-05 | 1.20E-07 | 0 |
| 380 | -1.53E-05 | 2.02E-07 | 0 |
| 400 | -1.64E-05 | 1.34E-07 | 0 |
| 420 | -1.72E-05 | 8.42E-08 | 0 |
| 440 | -1.79E-05 | 1.05E-07 | 0 |
| 460 | -1.86E-05 | 2.22E-07 | 0 |
| 480 | -1.93E-05 | 1.01E-07 | 0 |
| 500 | -2.23E-05 | 2.02E-06 | 1 |
| 520 | -2.14E-05 | 6.49E-07 | 0 |
| 540 | -2.16E-05 | 5.29E-07 | 0 |
| 560 | -2.25E-05 | 9.94E-08 | 0 |
| 580 | -2.33E-05 | 1.06E-07 | 0 |
| 600 | -2.43E-05 | 8.31E-08 | 1 |
| 620 | -2.47E-05 | 2.05E-07 | 0 |
| 640 | -2.59E-05 | 2.32E-07 | 0 |
| 660 | -2.70E-05 | 3.97E-07 | 0 |
| 680 | -2.79E-05 | 6.46E-08 | 0 |
| 700 | -2.89E-05 | 1.52E-07 | 0 |
| 720 | -2.98E-05 | 1.48E-07 | 0 |
| 740 | -3.10E-05 | 1.83E-07 | 0 |
| 760 | -3.14E-05 | 6.73E-07 | 0 |
| 780 | -3.29E-05 | 7.95E-08 | 0 |
| 800 | -3.38E-05 | 1.32E-07 | 0 |
| 820 | -3.50E-05 | 2.57E-07 | 0 |
| 840 | -3.61E-05 | 1.30E-07 | 0 |

|      |           |          |   |
|------|-----------|----------|---|
| 860  | -3.77E-05 | 7.94E-07 | 0 |
| 880  | -3.86E-05 | 2.84E-07 | 0 |
| 900  | -3.85E-05 | 8.45E-07 | 0 |
| 920  | -4.18E-05 | 1.67E-06 | 0 |
| 940  | -4.21E-05 | 7.54E-08 | 0 |
| 960  | -4.31E-05 | 1.30E-07 | 0 |
| 980  | -4.38E-05 | 6.44E-07 | 0 |
| 1000 | -4.55E-05 | 7.23E-07 | 0 |
| 1020 | -4.68E-05 | 1.22E-06 | 0 |
| 1040 | -4.64E-05 | 2.32E-07 | 0 |
| 1060 | -4.55E-05 | 1.44E-06 | 0 |
| 1080 | -5.04E-05 | 9.74E-07 | 0 |
| 1100 | -5.20E-05 | 6.35E-07 | 0 |
| 1120 | -5.37E-05 | 1.34E-06 | 0 |
| 1140 | -5.25E-05 | 1.42E-06 | 0 |
| 1160 | -3.80E-05 | 1.95E-05 | 1 |
| 1180 | -5.79E-05 | 2.73E-06 | 0 |
| 1200 | -5.94E-05 | 2.79E-06 | 0 |
| 1220 | -5.83E-05 | 4.13E-06 | 0 |
| 1240 | -5.47E-05 | 2.03E-06 | 0 |
| 1260 | -6.26E-05 | 1.04E-06 | 0 |
| 1280 | -6.20E-05 | 4.25E-06 | 0 |
| 1300 | -6.89E-05 | 2.50E-06 | 0 |
| 1320 | -6.18E-05 | 4.95E-06 | 0 |
| 1340 | -7.24E-05 | 6.37E-06 | 0 |
| 1360 | -6.89E-05 | 2.89E-06 | 0 |
| 1380 | -6.55E-05 | 2.85E-06 | 0 |
| 1400 | -6.95E-05 | 3.87E-06 | 0 |
| 1420 | -7.60E-05 | 2.96E-06 | 0 |
| 1440 | -7.26E-05 | 2.50E-06 | 0 |
| 1460 | -7.56E-05 | 9.80E-07 | 0 |
| 1480 | -7.64E-05 | 3.40E-06 | 0 |
| 1500 | -9.39E-05 | 5.48E-06 | 0 |
| 1520 | -8.61E-05 | 3.69E-06 | 0 |
| 1540 | -8.49E-05 | 2.86E-06 | 0 |
| 1560 | -8.43E-05 | 2.76E-06 | 0 |
| 1580 | -8.65E-05 | 3.27E-06 | 0 |
| 1600 | -5.79E-05 | 2.70E-05 | 1 |
| 1620 | -9.35E-05 | 6.16E-06 | 0 |
| 1640 | -8.51E-05 | 3.68E-06 | 0 |
| 1660 | -9.74E-05 | 5.37E-06 | 0 |

|      |           |          |   |
|------|-----------|----------|---|
| 1680 | -9.22E-05 | 3.70E-06 | 0 |
| 1700 | -9.47E-05 | 2.05E-06 | 0 |
| 1720 | -9.35E-05 | 4.89E-06 | 0 |
| 1740 | -9.85E-05 | 3.60E-06 | 0 |
| 1760 | -1.04E-04 | 8.08E-06 | 0 |
| 1780 | -1.08E-04 | 6.71E-06 | 0 |
| 1800 | -9.52E-05 | 5.10E-06 | 0 |
| 1820 | -1.10E-04 | 1.71E-06 | 0 |
| 1840 | -1.02E-04 | 3.68E-06 | 0 |
| 1860 | -1.08E-04 | 3.80E-06 | 0 |
| 1880 | -1.06E-04 | 6.89E-06 | 0 |
| 1900 | -1.14E-04 | 5.61E-06 | 0 |
| 1920 | -1.17E-04 | 4.43E-06 | 0 |
| 1940 | -1.11E-04 | 3.44E-06 | 0 |
| 1960 | -1.15E-04 | 3.52E-06 | 0 |
| 1980 | -1.17E-04 | 2.81E-06 | 0 |
| 2000 | -1.15E-04 | 5.54E-06 | 0 |

## Abdomen Pellet # 2

| Applied Magnetic Field<br>(Oe) | Average Magnetic Moment<br>(emu) | standard error<br>(emu) | # outliers<br>(>2 sigma) |
|--------------------------------|----------------------------------|-------------------------|--------------------------|
| 0                              | 2.74E-07                         | 1.47E-07                | 0                        |
| 30                             | -1.46E-06                        | 1.87E-07                | 0                        |
| 60                             | -3.33E-06                        | 4.71E-07                | 0                        |
| 90                             | -5.08E-06                        | 2.36E-07                | 0                        |
| 119                            | -7.07E-06                        | 3.46E-08                | 0                        |
| 149                            | -9.36E-06                        | 3.75E-07                | 0                        |
| 179                            | -1.03E-05                        | 2.84E-07                | 0                        |
| 209                            | -1.22E-05                        | 4.11E-07                | 0                        |
| 239                            | -1.41E-05                        | 6.20E-08                | 0                        |
| 269                            | -1.62E-05                        | 1.50E-07                | 0                        |
| 299                            | -1.79E-05                        | 1.59E-07                | 0                        |
| 328                            | -1.96E-05                        | 1.35E-07                | 0                        |
| 358                            | -2.17E-05                        | 7.56E-08                | 0                        |
| 388                            | -2.40E-05                        | 2.17E-06                | 0                        |
| 418                            | -2.51E-05                        | 6.77E-07                | 0                        |
| 448                            | -2.73E-05                        | 1.92E-07                | 0                        |
| 478                            | -2.89E-05                        | 1.29E-07                | 0                        |
| 507                            | -3.22E-05                        | 1.46E-06                | 1                        |
| 537                            | -3.28E-05                        | 2.19E-07                | 0                        |
| 567                            | -3.48E-05                        | 9.04E-08                | 0                        |
| 597                            | -3.47E-05                        | 1.54E-06                | 0                        |
| 627                            | -3.73E-05                        | 9.23E-07                | 0                        |
| 657                            | -4.12E-05                        | 1.07E-06                | 0                        |
| 687                            | -4.27E-05                        | 1.62E-07                | 0                        |
| 716                            | -4.49E-05                        | 1.47E-07                | 0                        |
| 746                            | -4.68E-05                        | 5.78E-08                | 0                        |
| 776                            | -4.91E-05                        | 5.05E-08                | 0                        |
| 806                            | -5.11E-05                        | 8.66E-08                | 0                        |
| 836                            | -5.21E-05                        | 1.63E-06                | 1                        |
| 866                            | -5.79E-05                        | 1.68E-06                | 0                        |
| 896                            | -5.72E-05                        | 2.17E-07                | 0                        |
| 925                            | -5.83E-05                        | 8.96E-07                | 1                        |
| 955                            | -6.16E-05                        | 2.52E-07                | 0                        |
| 985                            | -6.44E-05                        | 2.08E-07                | 0                        |
| 1015                           | -6.66E-05                        | 1.76E-07                | 0                        |
| 1045                           | -6.98E-05                        | 1.09E-06                | 0                        |
| 1075                           | -7.17E-05                        | 6.29E-07                | 0                        |

|      |           |          |   |
|------|-----------|----------|---|
| 1104 | -7.31E-05 | 5.40E-07 | 0 |
| 1134 | -7.51E-05 | 2.95E-07 | 0 |
| 1164 | -7.78E-05 | 4.87E-07 | 0 |
| 1194 | -8.06E-05 | 2.01E-07 | 0 |
| 1224 | -8.24E-05 | 1.44E-06 | 0 |
| 1254 | -8.17E-05 | 1.91E-06 | 0 |
| 1284 | -8.91E-05 | 2.85E-06 | 0 |
| 1313 | -8.97E-05 | 1.15E-06 | 0 |
| 1343 | -9.08E-05 | 7.92E-07 | 0 |
| 1373 | -9.37E-05 | 4.66E-07 | 0 |
| 1403 | -9.62E-05 | 2.94E-07 | 0 |
| 1433 | -1.01E-04 | 8.23E-07 | 0 |
| 1463 | -1.02E-04 | 6.15E-07 | 0 |
| 1493 | -1.02E-04 | 1.09E-06 | 0 |
| 1522 | -1.13E-04 | 7.00E-06 | 1 |
| 1552 | -1.09E-04 | 7.14E-07 | 0 |
| 1582 | -1.11E-04 | 8.17E-07 | 0 |
| 1612 | -1.20E-04 | 4.67E-06 | 0 |
| 1642 | -1.15E-04 | 1.41E-06 | 0 |
| 1672 | -1.19E-04 | 2.88E-06 | 0 |
| 1701 | -1.18E-04 | 7.53E-07 | 0 |
| 1731 | -1.24E-04 | 1.59E-06 | 0 |
| 1761 | -1.27E-04 | 2.23E-07 | 0 |
| 1791 | -1.28E-04 | 4.89E-06 | 1 |
| 1821 | -1.35E-04 | 3.39E-06 | 0 |
| 1851 | -1.36E-04 | 4.81E-06 | 1 |
| 1881 | -1.37E-04 | 1.30E-06 | 0 |
| 1910 | -1.47E-04 | 9.18E-06 | 0 |
| 1940 | -1.41E-04 | 7.88E-07 | 0 |
| 1970 | -1.45E-04 | 2.41E-06 | 0 |
| 2000 | -1.47E-04 | 2.81E-06 | 0 |
| 2000 | -1.45E-04 | 8.83E-07 | 0 |
| 1970 | -1.43E-04 | 5.77E-08 | 0 |
| 1940 | -1.41E-04 | 2.25E-07 | 0 |
| 1910 | -1.38E-04 | 1.87E-07 | 0 |
| 1881 | -1.36E-04 | 1.94E-07 | 0 |
| 1851 | -1.33E-04 | 8.70E-08 | 0 |
| 1821 | -1.31E-04 | 3.46E-07 | 0 |
| 1791 | -1.28E-04 | 2.10E-07 | 0 |
| 1761 | -1.26E-04 | 6.31E-08 | 0 |
| 1731 | -1.23E-04 | 5.83E-08 | 0 |

|      |           |          |   |
|------|-----------|----------|---|
| 1701 | -1.21E-04 | 2.42E-07 | 0 |
| 1672 | -1.18E-04 | 2.51E-07 | 0 |
| 1642 | -1.16E-04 | 9.39E-08 | 0 |
| 1612 | -1.13E-04 | 7.93E-08 | 0 |
| 1582 | -1.10E-04 | 8.89E-07 | 0 |
| 1552 | -1.08E-04 | 3.72E-07 | 0 |
| 1522 | -1.06E-04 | 4.76E-07 | 0 |
| 1493 | -1.04E-04 | 7.33E-08 | 0 |
| 1463 | -1.01E-04 | 1.82E-07 | 0 |
| 1433 | -9.84E-05 | 2.91E-07 | 0 |
| 1403 | -9.56E-05 | 1.43E-07 | 0 |
| 1373 | -9.34E-05 | 3.73E-08 | 0 |
| 1343 | -9.17E-05 | 1.09E-06 | 0 |
| 1313 | -8.75E-05 | 5.34E-07 | 0 |
| 1284 | -8.67E-05 | 5.27E-07 | 0 |
| 1254 | -8.40E-05 | 9.51E-08 | 0 |
| 1224 | -8.17E-05 | 2.06E-07 | 0 |
| 1194 | -7.89E-05 | 2.11E-07 | 0 |
| 1164 | -7.67E-05 | 1.37E-07 | 0 |
| 1134 | -7.45E-05 | 7.30E-08 | 0 |
| 1104 | -7.21E-05 | 4.09E-07 | 0 |
| 1075 | -6.95E-05 | 8.94E-07 | 0 |
| 1045 | -6.74E-05 | 2.16E-07 | 0 |
| 1015 | -6.54E-05 | 1.83E-07 | 0 |
| 985  | -6.29E-05 | 7.51E-08 | 0 |
| 955  | -6.06E-05 | 1.22E-07 | 0 |
| 925  | -5.80E-05 | 1.36E-07 | 0 |
| 896  | -5.64E-05 | 4.78E-07 | 0 |
| 866  | -5.37E-05 | 3.40E-07 | 0 |
| 836  | -5.16E-05 | 2.28E-07 | 0 |
| 806  | -4.94E-05 | 2.13E-07 | 0 |
| 776  | -4.67E-05 | 2.20E-07 | 0 |
| 746  | -4.47E-05 | 1.19E-07 | 0 |
| 716  | -4.09E-05 | 8.89E-07 | 0 |
| 687  | -4.12E-05 | 1.02E-06 | 0 |
| 657  | -3.87E-05 | 3.40E-07 | 0 |
| 627  | -3.68E-05 | 3.45E-07 | 0 |
| 597  | -3.40E-05 | 3.69E-07 | 0 |
| 567  | -3.18E-05 | 1.93E-07 | 0 |
| 537  | -3.01E-05 | 5.73E-08 | 0 |
| 507  | -2.87E-05 | 1.34E-06 | 0 |



|      |           |          |   |
|------|-----------|----------|---|
| 478  | -2.65E-05 | 1.55E-06 | 0 |
| 448  | -2.49E-05 | 3.93E-07 | 0 |
| 418  | -2.25E-05 | 1.60E-07 | 0 |
| 388  | -2.06E-05 | 2.49E-07 | 0 |
| 358  | -1.77E-05 | 1.59E-07 | 0 |
| 328  | -1.67E-05 | 2.62E-07 | 0 |
| 299  | -1.44E-05 | 1.61E-07 | 0 |
| 269  | -1.27E-05 | 4.19E-07 | 0 |
| 239  | -1.11E-05 | 2.51E-07 | 0 |
| 209  | -8.91E-06 | 2.03E-07 | 0 |
| 179  | -7.09E-06 | 1.28E-07 | 0 |
| 149  | -4.32E-06 | 7.06E-07 | 0 |
| 119  | -3.13E-06 | 2.14E-07 | 0 |
| 90   | -2.45E-06 | 5.39E-07 | 0 |
| 60   | -1.50E-06 | 4.34E-07 | 0 |
| 30   | 1.86E-06  | 1.87E-07 | 0 |
| 0    | 5.10E-07  | 1.95E-06 | 0 |
| 0    | 6.92E-06  | 3.77E-06 | 1 |
| -30  | 5.17E-06  | 2.75E-07 | 0 |
| -60  | 5.83E-06  | 7.17E-08 | 0 |
| -90  | 7.70E-06  | 1.93E-07 | 0 |
| -119 | 9.62E-06  | 1.37E-07 | 0 |
| -149 | 1.11E-05  | 1.84E-06 | 0 |
| -179 | 1.07E-05  | 7.84E-07 | 0 |
| -209 | 1.44E-05  | 1.26E-07 | 0 |
| -239 | 1.58E-05  | 1.49E-07 | 0 |
| -269 | 1.82E-05  | 1.38E-07 | 0 |
| -299 | 1.99E-05  | 1.06E-07 | 0 |
| -328 | 2.09E-05  | 2.25E-07 | 0 |
| -358 | 2.33E-05  | 1.73E-07 | 0 |
| -388 | 2.31E-05  | 1.04E-06 | 0 |
| -418 | 2.66E-05  | 2.26E-07 | 0 |
| -448 | 2.85E-05  | 6.76E-08 | 0 |
| -478 | 3.26E-05  | 2.87E-06 | 0 |
| -507 | 3.25E-05  | 1.18E-07 | 0 |
| -537 | 3.41E-05  | 2.34E-07 | 0 |
| -567 | 3.57E-05  | 1.12E-07 | 0 |
| -597 | 3.77E-05  | 1.11E-07 | 0 |
| -627 | 3.23E-05  | 3.68E-06 | 0 |
| -657 | 4.29E-05  | 2.31E-06 | 0 |
| -687 | 4.40E-05  | 1.85E-07 | 0 |

|       |          |          |   |
|-------|----------|----------|---|
| -716  | 4.53E-05 | 2.42E-07 | 0 |
| -746  | 4.77E-05 | 9.75E-08 | 0 |
| -776  | 4.97E-05 | 1.16E-07 | 0 |
| -806  | 4.77E-05 | 2.30E-06 | 0 |
| -836  | 5.43E-05 | 2.95E-07 | 0 |
| -866  | 5.59E-05 | 3.04E-07 | 0 |
| -896  | 5.81E-05 | 3.36E-07 | 0 |
| -925  | 6.08E-05 | 2.17E-07 | 0 |
| -955  | 6.34E-05 | 5.75E-07 | 0 |
| -1015 | 6.89E-05 | 1.99E-06 | 1 |
| -1045 | 6.83E-05 | 3.06E-07 | 0 |
| -1075 | 7.18E-05 | 6.25E-06 | 0 |
| -1104 | 7.30E-05 | 1.34E-06 | 0 |
| -1134 | 7.68E-05 | 3.46E-06 | 0 |
| -1164 | 7.91E-05 | 2.45E-06 | 0 |
| -1194 | 8.19E-05 | 9.23E-07 | 0 |
| -1224 | 8.13E-05 | 1.47E-06 | 0 |
| -1254 | 8.47E-05 | 1.38E-06 | 0 |
| -1284 | 8.65E-05 | 2.54E-06 | 0 |
| -1313 | 9.11E-05 | 5.96E-06 | 0 |
| -1343 | 9.43E-05 | 2.09E-06 | 0 |
| -1373 | 9.71E-05 | 2.29E-06 | 0 |
| -1403 | 9.69E-05 | 5.94E-06 | 0 |
| -1433 | 9.69E-05 | 1.27E-06 | 0 |
| -1463 | 1.02E-04 | 1.09E-05 | 0 |
| -1493 | 1.04E-04 | 6.58E-06 | 0 |
| -1522 | 1.01E-04 | 2.85E-06 | 0 |
| -1552 | 1.01E-04 | 2.02E-06 | 0 |
| -1582 | 1.13E-04 | 4.58E-06 | 0 |
| -1612 | 1.27E-04 | 2.52E-06 | 0 |
| -1642 | 1.19E-04 | 8.51E-06 | 0 |
| -1672 | 1.20E-04 | 1.97E-06 | 0 |
| -1701 | 1.24E-04 | 2.48E-06 | 0 |
| -1731 | 1.38E-04 | 1.11E-05 | 0 |
| -1761 | 1.31E-04 | 6.20E-06 | 0 |
| -1791 | 1.23E-04 | 7.70E-06 | 0 |
| -1821 | 1.20E-04 | 7.65E-06 | 0 |
| -1851 | 1.25E-04 | 6.29E-06 | 0 |
| -1881 | 1.30E-04 | 5.44E-06 | 0 |
| -1910 | 1.31E-04 | 7.77E-06 | 0 |
| -1940 | 1.44E-04 | 3.99E-06 | 0 |

|       |          |          |   |
|-------|----------|----------|---|
| -1970 | 1.33E-04 | 7.66E-06 | 0 |
| -2000 | 1.43E-04 | 7.91E-06 | 0 |
| -2000 | 1.46E-04 | 4.19E-06 | 1 |
| -1970 | 1.44E-04 | 2.51E-07 | 0 |
| -1940 | 1.41E-04 | 5.15E-08 | 0 |
| -1910 | 1.39E-04 | 7.27E-08 | 0 |
| -1881 | 1.36E-04 | 2.10E-07 | 0 |
| -1851 | 1.33E-04 | 1.03E-07 | 0 |
| -1821 | 1.31E-04 | 6.13E-08 | 0 |
| -1791 | 1.28E-04 | 1.20E-07 | 0 |
| -1761 | 1.26E-04 | 9.08E-08 | 0 |
| -1731 | 1.23E-04 | 6.18E-08 | 0 |
| -1701 | 1.20E-04 | 8.79E-08 | 0 |
| -1672 | 1.18E-04 | 2.41E-07 | 0 |
| -1642 | 1.16E-04 | 1.11E-07 | 0 |
| -1612 | 1.13E-04 | 5.04E-08 | 0 |
| -1582 | 1.11E-04 | 1.36E-07 | 0 |
| -1552 | 1.09E-04 | 1.70E-07 | 0 |
| -1522 | 1.06E-04 | 1.43E-07 | 0 |
| -1493 | 1.04E-04 | 1.13E-07 | 0 |
| -1463 | 1.01E-04 | 2.42E-07 | 0 |
| -1433 | 9.91E-05 | 7.68E-07 | 0 |
| -1403 | 9.60E-05 | 5.30E-08 | 0 |
| -1373 | 9.37E-05 | 8.94E-08 | 0 |
| -1343 | 9.20E-05 | 5.39E-07 | 0 |
| -1313 | 8.91E-05 | 1.79E-07 | 0 |
| -1284 | 8.67E-05 | 3.99E-08 | 0 |
| -1254 | 8.38E-05 | 7.97E-07 | 0 |
| -1224 | 8.16E-05 | 7.05E-07 | 0 |
| -1194 | 7.98E-05 | 1.26E-06 | 1 |
| -1164 | 7.71E-05 | 1.13E-07 | 0 |
| -1134 | 7.58E-05 | 3.02E-07 | 0 |
| -1104 | 7.19E-05 | 2.49E-07 | 0 |
| -1075 | 7.00E-05 | 4.19E-08 | 0 |
| -1045 | 6.59E-05 | 1.49E-06 | 0 |
| -1015 | 6.36E-05 | 1.36E-06 | 0 |
| -985  | 6.20E-05 | 1.14E-06 | 0 |
| -955  | 6.15E-05 | 6.39E-07 | 1 |
| -925  | 5.89E-05 | 2.97E-07 | 0 |
| -896  | 5.67E-05 | 7.48E-08 | 0 |
| -866  | 5.42E-05 | 1.27E-07 | 0 |

|      |           |          |   |
|------|-----------|----------|---|
| -836 | 5.18E-05  | 9.33E-08 | 0 |
| -806 | 4.97E-05  | 2.94E-07 | 0 |
| -776 | 4.84E-05  | 3.24E-07 | 0 |
| -746 | 4.37E-05  | 2.02E-06 | 1 |
| -716 | 4.32E-05  | 2.65E-08 | 0 |
| -687 | 4.12E-05  | 1.47E-07 | 0 |
| -657 | 3.91E-05  | 1.76E-07 | 0 |
| -627 | 3.72E-05  | 1.23E-07 | 0 |
| -597 | 3.48E-05  | 1.54E-07 | 0 |
| -567 | 3.33E-05  | 3.72E-07 | 0 |
| -537 | 3.10E-05  | 2.66E-07 | 0 |
| -507 | 3.01E-05  | 1.07E-06 | 0 |
| -478 | 2.66E-05  | 7.64E-08 | 0 |
| -448 | 2.50E-05  | 2.62E-07 | 0 |
| -418 | 2.39E-05  | 7.06E-07 | 0 |
| -388 | 2.07E-05  | 2.32E-07 | 0 |
| -358 | 1.99E-05  | 3.35E-07 | 0 |
| -328 | 1.55E-05  | 2.32E-06 | 1 |
| -299 | 1.50E-05  | 4.30E-08 | 0 |
| -269 | 8.95E-06  | 5.14E-06 | 1 |
| -239 | 1.06E-05  | 1.06E-06 | 0 |
| -209 | 9.45E-06  | 3.30E-07 | 0 |
| -179 | 8.13E-06  | 3.19E-07 | 0 |
| -149 | 6.03E-06  | 9.05E-08 | 0 |
| -119 | 4.25E-06  | 1.16E-07 | 0 |
| -90  | -1.20E-06 | 3.13E-06 | 0 |
| -60  | 1.95E-06  | 4.22E-06 | 0 |
| -30  | 2.45E-06  | 4.47E-06 | 1 |
| 0    | -1.67E-06 | 3.33E-07 | 0 |
| 0    | -3.32E-06 | 6.84E-07 | 1 |
| 30   | -4.02E-06 | 9.16E-08 | 0 |
| 60   | -4.29E-06 | 2.48E-06 | 0 |
| 90   | -7.56E-06 | 8.63E-08 | 0 |
| 119  | -9.17E-06 | 3.21E-07 | 0 |
| 149  | -1.08E-05 | 2.03E-07 | 0 |
| 179  | -1.20E-05 | 1.12E-07 | 0 |
| 209  | -1.47E-05 | 1.22E-06 | 0 |
| 239  | -1.46E-05 | 7.20E-07 | 0 |
| 269  | -1.57E-05 | 1.92E-07 | 0 |
| 328  | -2.04E-05 | 2.12E-07 | 0 |
| 358  | -2.21E-05 | 1.05E-07 | 0 |

|      |           |          |   |
|------|-----------|----------|---|
| 388  | -2.37E-05 | 1.70E-07 | 0 |
| 418  | -2.44E-05 | 6.23E-07 | 0 |
| 448  | -2.78E-05 | 3.05E-07 | 0 |
| 478  | -2.94E-05 | 3.02E-08 | 0 |
| 507  | -3.13E-05 | 8.17E-07 | 0 |
| 537  | -3.33E-05 | 1.90E-07 | 0 |
| 567  | -3.40E-05 | 3.48E-07 | 0 |
| 597  | -3.68E-05 | 1.39E-07 | 0 |
| 627  | -3.67E-05 | 1.80E-06 | 0 |
| 657  | -4.08E-05 | 1.49E-07 | 0 |
| 687  | -4.34E-05 | 9.42E-07 | 1 |
| 716  | -4.47E-05 | 9.72E-08 | 0 |
| 746  | -4.69E-05 | 2.53E-07 | 0 |
| 776  | -5.28E-05 | 4.95E-06 | 1 |
| 806  | -5.34E-05 | 2.02E-06 | 0 |
| 836  | -5.06E-05 | 1.91E-06 | 0 |
| 866  | -5.69E-05 | 1.66E-06 | 1 |
| 896  | -5.98E-05 | 5.68E-06 | 0 |
| 925  | -5.95E-05 | 2.20E-07 | 0 |
| 955  | -6.15E-05 | 3.37E-07 | 0 |
| 985  | -6.27E-05 | 4.59E-07 | 0 |
| 1015 | -6.79E-05 | 1.71E-06 | 0 |
| 1045 | -6.71E-05 | 1.11E-06 | 0 |
| 1075 | -7.00E-05 | 4.03E-07 | 0 |
| 1104 | -7.21E-05 | 4.28E-06 | 0 |
| 1134 | -7.54E-05 | 3.33E-06 | 0 |
| 1164 | -7.34E-05 | 3.14E-06 | 0 |
| 1194 | -8.11E-05 | 2.14E-06 | 0 |
| 1224 | -7.68E-05 | 1.51E-06 | 0 |
| 1254 | -8.48E-05 | 2.00E-06 | 0 |
| 1284 | -8.39E-05 | 2.28E-06 | 0 |
| 1313 | -7.85E-05 | 7.47E-06 | 0 |
| 1343 | -8.69E-05 | 3.13E-06 | 0 |
| 1373 | -7.80E-05 | 6.79E-06 | 0 |
| 1403 | -9.47E-05 | 1.64E-06 | 0 |
| 1433 | -9.38E-05 | 3.71E-06 | 0 |
| 1463 | -1.14E-04 | 8.01E-06 | 0 |
| 1493 | -1.04E-04 | 3.47E-06 | 0 |
| 1522 | -1.03E-04 | 2.18E-06 | 0 |
| 1552 | -1.11E-04 | 4.29E-06 | 0 |
| 1582 | -1.08E-04 | 7.05E-06 | 0 |

|      |           |          |   |
|------|-----------|----------|---|
| 1612 | -1.11E-04 | 9.18E-06 | 0 |
| 1642 | -1.08E-04 | 8.52E-06 | 0 |
| 1672 | -1.08E-04 | 6.85E-06 | 0 |
| 1701 | -1.27E-04 | 3.88E-06 | 0 |
| 1731 | -1.34E-04 | 1.08E-05 | 0 |
| 1761 | -1.33E-04 | 8.47E-06 | 0 |
| 1791 | -1.27E-04 | 6.17E-06 | 0 |
| 1821 | -1.30E-04 | 1.21E-05 | 0 |
| 1851 | -1.28E-04 | 1.48E-05 | 0 |
| 1881 | -1.36E-04 | 3.31E-06 | 0 |
| 1910 | -1.39E-04 | 6.14E-06 | 0 |
| 1940 | -1.49E-04 | 3.32E-06 | 0 |
| 1970 | -1.37E-04 | 6.30E-06 | 0 |











### Abdomen Pellet # 3

| Applied Magnetic Field<br>(Oe) | Average Magnetic Moment<br>(emu) | standard error<br>(emu) | # outliers<br>(>2 sigma) |
|--------------------------------|----------------------------------|-------------------------|--------------------------|
| 0                              | 7.17E-07                         | 4.20E-08                | 0                        |
| 30                             | -2.15E-06                        | 1.22E-07                | 0                        |
| 60                             | -4.75E-06                        | 2.64E-07                | 0                        |
| 90                             | -7.62E-06                        | 5.64E-08                | 0                        |
| 119                            | -1.07E-05                        | 1.71E-07                | 0                        |
| 149                            | -1.32E-05                        | 8.04E-08                | 0                        |
| 179                            | -1.58E-05                        | 2.37E-07                | 0                        |
| 209                            | -1.85E-05                        | 8.37E-08                | 0                        |
| 239                            | -2.11E-05                        | 1.57E-07                | 0                        |
| 269                            | -2.39E-05                        | 2.20E-07                | 0                        |
| 299                            | -2.66E-05                        | 1.09E-07                | 0                        |
| 328                            | -2.94E-05                        | 9.09E-08                | 0                        |
| 358                            | -3.29E-05                        | 1.86E-07                | 0                        |
| 388                            | -3.38E-05                        | 1.44E-06                | 1                        |
| 418                            | -3.74E-05                        | 6.91E-08                | 0                        |
| 448                            | -3.89E-05                        | 5.00E-07                | 0                        |
| 478                            | -4.26E-05                        | 2.10E-07                | 0                        |
| 507                            | -4.60E-05                        | 4.17E-08                | 0                        |
| 537                            | -5.49E-05                        | 4.54E-06                | 1                        |
| 567                            | -5.22E-05                        | 3.24E-07                | 0                        |
| 597                            | -5.32E-05                        | 6.65E-07                | 0                        |
| 627                            | -5.72E-05                        | 1.62E-07                | 0                        |
| 657                            | -6.00E-05                        | 1.69E-07                | 0                        |
| 687                            | -6.06E-05                        | 6.09E-07                | 0                        |
| 716                            | -6.59E-05                        | 7.21E-08                | 0                        |
| 746                            | -6.87E-05                        | 2.25E-07                | 0                        |
| 776                            | -7.18E-05                        | 1.23E-07                | 0                        |
| 806                            | -7.42E-05                        | 1.28E-06                | 0                        |
| 836                            | -7.83E-05                        | 1.12E-06                | 0                        |
| 866                            | -7.90E-05                        | 1.16E-06                | 1                        |
| 896                            | -8.34E-05                        | 2.31E-07                | 0                        |
| 925                            | -8.62E-05                        | 1.18E-07                | 0                        |
| 955                            | -8.98E-05                        | 3.77E-07                | 0                        |
| 985                            | -9.23E-05                        | 1.35E-07                | 0                        |
| 1015                           | -9.84E-05                        | 1.37E-06                | 0                        |
| 1045                           | -9.43E-05                        | 2.21E-06                | 0                        |
| 1075                           | -9.86E-05                        | 2.45E-06                | 1                        |

|      |           |          |   |
|------|-----------|----------|---|
| 1104 | -1.03E-04 | 3.63E-07 | 0 |
| 1134 | -1.11E-04 | 4.37E-06 | 1 |
| 1164 | -1.11E-04 | 3.96E-07 | 0 |
| 1194 | -1.14E-04 | 2.36E-07 | 0 |
| 1224 | -1.16E-04 | 1.33E-06 | 0 |
| 1254 | -1.21E-04 | 2.33E-06 | 0 |
| 1284 | -1.21E-04 | 5.46E-07 | 0 |
| 1313 | -1.27E-04 | 1.31E-06 | 0 |
| 1343 | -1.28E-04 | 8.16E-07 | 0 |
| 1373 | -1.33E-04 | 5.57E-07 | 0 |
| 1403 | -1.34E-04 | 1.28E-06 | 0 |
| 1433 | -1.41E-04 | 3.14E-06 | 0 |
| 1463 | -1.41E-04 | 1.77E-06 | 0 |
| 1493 | -1.51E-04 | 4.93E-06 | 0 |
| 1522 | -1.45E-04 | 1.47E-06 | 0 |
| 1552 | -1.47E-04 | 3.06E-06 | 0 |
| 1582 | -1.52E-04 | 1.71E-06 | 0 |
| 1612 | -1.56E-04 | 6.04E-07 | 0 |
| 1642 | -1.59E-04 | 9.57E-07 | 0 |
| 1672 | -1.62E-04 | 5.19E-06 | 0 |
| 1701 | -1.67E-04 | 7.92E-07 | 0 |
| 1731 | -1.70E-04 | 1.65E-06 | 0 |
| 1761 | -1.75E-04 | 3.73E-06 | 0 |
| 1791 | -1.74E-04 | 1.88E-06 | 0 |
| 1821 | -1.78E-04 | 1.47E-06 | 0 |
| 1851 | -1.81E-04 | 1.13E-06 | 0 |
| 1881 | -1.81E-04 | 2.68E-06 | 0 |
| 1910 | -1.86E-04 | 1.37E-06 | 0 |
| 1940 | -1.94E-04 | 4.98E-06 | 0 |
| 1970 | -1.95E-04 | 2.27E-06 | 0 |
| 2000 | -1.93E-04 | 5.59E-06 | 0 |
| 2000 | -2.06E-04 | 4.45E-06 | 0 |
| 1970 | -1.94E-04 | 4.96E-07 | 0 |
| 1940 | -1.91E-04 | 2.06E-07 | 0 |
| 1910 | -1.88E-04 | 5.88E-08 | 0 |
| 1881 | -1.84E-04 | 5.92E-07 | 0 |
| 1851 | -1.82E-04 | 2.38E-07 | 0 |
| 1821 | -1.78E-04 | 1.35E-07 | 0 |
| 1791 | -1.75E-04 | 2.69E-08 | 0 |
| 1761 | -1.72E-04 | 6.43E-08 | 0 |
| 1731 | -1.69E-04 | 1.39E-07 | 0 |

|      |           |          |   |
|------|-----------|----------|---|
| 1701 | -1.66E-04 | 1.43E-07 | 0 |
| 1672 | -1.62E-04 | 2.80E-08 | 0 |
| 1642 | -1.59E-04 | 3.02E-07 | 0 |
| 1612 | -1.56E-04 | 4.51E-07 | 0 |
| 1582 | -1.53E-04 | 3.91E-07 | 0 |
| 1552 | -1.50E-04 | 1.11E-07 | 0 |
| 1522 | -1.47E-04 | 1.55E-07 | 0 |
| 1493 | -1.44E-04 | 1.14E-07 | 0 |
| 1463 | -1.40E-04 | 9.78E-08 | 0 |
| 1433 | -1.36E-04 | 1.14E-06 | 1 |
| 1403 | -1.35E-04 | 8.61E-07 | 0 |
| 1373 | -1.32E-04 | 5.71E-07 | 0 |
| 1343 | -1.28E-04 | 2.08E-07 | 0 |
| 1313 | -1.25E-04 | 7.31E-08 | 0 |
| 1284 | -1.22E-04 | 3.86E-07 | 0 |
| 1254 | -1.19E-04 | 1.91E-07 | 0 |
| 1224 | -1.16E-04 | 1.21E-07 | 0 |
| 1194 | -1.13E-04 | 6.52E-08 | 0 |
| 1164 | -1.08E-04 | 1.34E-06 | 0 |
| 1134 | -1.06E-04 | 1.43E-06 | 0 |
| 1104 | -1.05E-04 | 2.20E-06 | 0 |
| 1075 | -1.01E-04 | 1.68E-07 | 0 |
| 1045 | -9.77E-05 | 1.97E-07 | 0 |
| 1015 | -9.40E-05 | 1.96E-07 | 0 |
| 985  | -9.10E-05 | 8.05E-08 | 0 |
| 955  | -8.80E-05 | 1.11E-08 | 0 |
| 925  | -8.56E-05 | 2.32E-06 | 0 |
| 896  | -8.00E-05 | 5.50E-07 | 0 |
| 866  | -7.74E-05 | 1.30E-06 | 0 |
| 836  | -7.64E-05 | 3.15E-07 | 0 |
| 806  | -7.36E-05 | 2.98E-07 | 0 |
| 776  | -6.99E-05 | 3.07E-07 | 0 |
| 746  | -6.71E-05 | 1.33E-07 | 0 |
| 716  | -6.13E-05 | 2.84E-06 | 1 |
| 687  | -6.20E-05 | 1.18E-06 | 0 |
| 657  | -5.75E-05 | 2.17E-06 | 0 |
| 627  | -5.55E-05 | 2.40E-07 | 0 |
| 597  | -5.30E-05 | 4.41E-07 | 0 |
| 567  | -4.99E-05 | 2.86E-07 | 0 |
| 537  | -4.66E-05 | 1.22E-07 | 0 |
| 507  | -4.37E-05 | 1.12E-07 | 0 |

|      |           |          |   |
|------|-----------|----------|---|
| 478  | -4.18E-05 | 7.45E-07 | 0 |
| 448  | -3.78E-05 | 1.72E-07 | 0 |
| 418  | -3.54E-05 | 4.59E-07 | 0 |
| 388  | -3.29E-05 | 3.20E-07 | 0 |
| 358  | -2.93E-05 | 9.58E-08 | 0 |
| 328  | -2.77E-05 | 8.37E-07 | 0 |
| 299  | -2.13E-05 | 2.19E-06 | 0 |
| 269  | -2.12E-05 | 4.40E-07 | 0 |
| 239  | -2.03E-05 | 1.03E-06 | 0 |
| 209  | -1.57E-05 | 2.18E-07 | 0 |
| 179  | -1.27E-05 | 1.69E-07 | 0 |
| 149  | -1.04E-05 | 3.56E-07 | 0 |
| 119  | -8.42E-06 | 5.23E-07 | 0 |
| 90   | -6.46E-06 | 6.21E-07 | 0 |
| 60   | 9.19E-07  | 4.61E-06 | 0 |
| 30   | 2.42E-07  | 3.35E-07 | 0 |
| 0    | 1.82E-05  | 6.59E-06 | 0 |
| 0    | 1.31E-06  | 3.45E-06 | 0 |
| -30  | 4.01E-06  | 7.41E-07 | 0 |
| -60  | 8.11E-06  | 4.45E-07 | 0 |
| -90  | 9.82E-06  | 5.64E-07 | 0 |
| -119 | 1.60E-05  | 4.26E-06 | 0 |
| -149 | 1.60E-05  | 1.80E-07 | 0 |
| -179 | 1.87E-05  | 3.62E-08 | 0 |
| -209 | 2.12E-05  | 1.15E-06 | 0 |
| -239 | 2.38E-05  | 1.53E-07 | 0 |
| -269 | 2.55E-05  | 3.13E-07 | 0 |
| -299 | 3.34E-05  | 5.61E-06 | 1 |
| -328 | 3.19E-05  | 8.67E-08 | 0 |
| -358 | 3.42E-05  | 9.52E-08 | 0 |
| -388 | 2.52E-05  | 9.87E-06 | 1 |
| -418 | 3.84E-05  | 6.43E-07 | 0 |
| -448 | 4.11E-05  | 5.43E-07 | 0 |
| -478 | 4.26E-05  | 1.12E-06 | 1 |
| -507 | 4.77E-05  | 3.19E-07 | 0 |
| -537 | 5.05E-05  | 1.69E-07 | 0 |
| -567 | 5.14E-05  | 1.21E-06 | 0 |
| -597 | 5.59E-05  | 5.84E-07 | 0 |
| -627 | 5.78E-05  | 1.37E-07 | 0 |
| -657 | 6.16E-05  | 2.28E-07 | 0 |
| -687 | 6.45E-05  | 9.67E-08 | 0 |

|       |          |          |   |
|-------|----------|----------|---|
| -716  | 6.83E-05 | 1.07E-06 | 0 |
| -746  | 6.88E-05 | 2.00E-06 | 0 |
| -776  | 7.27E-05 | 1.79E-07 | 0 |
| -806  | 7.62E-05 | 4.69E-07 | 0 |
| -836  | 7.88E-05 | 1.46E-07 | 0 |
| -866  | 8.36E-05 | 2.68E-06 | 0 |
| -896  | 8.74E-05 | 3.05E-06 | 0 |
| -925  | 8.24E-05 | 1.13E-06 | 0 |
| -955  | 8.76E-05 | 8.80E-07 | 0 |
| -985  | 9.37E-05 | 2.51E-07 | 1 |
| -1015 | 9.60E-05 | 7.23E-07 | 0 |
| -1045 | 1.05E-04 | 4.54E-06 | 0 |
| -1075 | 1.02E-04 | 1.29E-06 | 0 |
| -1104 | 1.04E-04 | 3.42E-06 | 0 |
| -1134 | 1.08E-04 | 1.44E-06 | 0 |
| -1164 | 1.13E-04 | 1.74E-06 | 0 |
| -1194 | 1.14E-04 | 1.12E-06 | 0 |
| -1224 | 1.18E-04 | 8.14E-07 | 0 |
| -1254 | 1.20E-04 | 3.78E-06 | 0 |
| -1284 | 1.26E-04 | 1.97E-06 | 0 |
| -1313 | 1.27E-04 | 1.68E-06 | 0 |
| -1343 | 1.31E-04 | 4.54E-06 | 0 |
| -1373 | 1.32E-04 | 7.71E-07 | 0 |
| -1403 | 1.27E-04 | 6.70E-06 | 0 |
| -1433 | 1.32E-04 | 5.39E-06 | 0 |
| -1463 | 1.43E-04 | 3.25E-06 | 0 |
| -1493 | 1.44E-04 | 6.21E-06 | 0 |
| -1522 | 1.47E-04 | 2.60E-06 | 0 |
| -1552 | 1.51E-04 | 5.34E-06 | 0 |
| -1582 | 1.21E-04 | 3.90E-05 | 1 |
| -1612 | 1.65E-04 | 8.26E-06 | 0 |
| -1642 | 1.54E-04 | 7.62E-06 | 0 |
| -1672 | 1.63E-04 | 2.54E-06 | 0 |
| -1701 | 1.70E-04 | 3.33E-06 | 0 |
| -1731 | 1.74E-04 | 4.82E-06 | 0 |
| -1761 | 1.65E-04 | 1.03E-05 | 0 |
| -1791 | 1.73E-04 | 7.55E-06 | 0 |
| -1821 | 1.69E-04 | 6.82E-06 | 0 |
| -1851 | 1.86E-04 | 5.21E-06 | 0 |
| -1881 | 1.84E-04 | 3.14E-06 | 0 |
| -1910 | 1.88E-04 | 4.44E-06 | 0 |

|       |          |          |   |
|-------|----------|----------|---|
| -1940 | 1.88E-04 | 4.70E-06 | 0 |
| -1970 | 1.55E-04 | 1.65E-05 | 0 |
| -2000 | 1.90E-04 | 6.75E-06 | 0 |
| -2000 | 1.96E-04 | 2.22E-06 | 0 |
| -1970 | 1.96E-04 | 5.35E-08 | 0 |
| -1940 | 1.91E-04 | 6.97E-07 | 0 |
| -1910 | 1.89E-04 | 3.09E-07 | 0 |
| -1881 | 1.86E-04 | 2.71E-07 | 0 |
| -1851 | 1.83E-04 | 8.16E-08 | 0 |
| -1821 | 1.80E-04 | 1.70E-07 | 0 |
| -1791 | 1.76E-04 | 3.51E-07 | 0 |
| -1761 | 1.73E-04 | 1.10E-07 | 0 |
| -1731 | 1.70E-04 | 3.91E-08 | 0 |
| -1701 | 1.66E-04 | 1.32E-07 | 0 |
| -1672 | 1.64E-04 | 2.05E-07 | 0 |
| -1642 | 1.60E-04 | 2.31E-07 | 0 |
| -1612 | 1.57E-04 | 6.14E-08 | 0 |
| -1582 | 1.54E-04 | 1.04E-07 | 0 |
| -1552 | 1.51E-04 | 1.85E-07 | 0 |
| -1522 | 1.48E-04 | 3.83E-08 | 0 |
| -1493 | 1.45E-04 | 5.36E-07 | 0 |
| -1463 | 1.42E-04 | 3.96E-07 | 0 |
| -1433 | 1.38E-04 | 5.07E-08 | 0 |
| -1403 | 1.35E-04 | 1.04E-07 | 0 |
| -1373 | 1.33E-04 | 2.03E-07 | 0 |
| -1343 | 1.29E-04 | 2.74E-07 | 0 |
| -1313 | 1.26E-04 | 6.86E-08 | 0 |
| -1284 | 1.23E-04 | 2.46E-07 | 0 |
| -1254 | 1.20E-04 | 4.46E-07 | 0 |
| -1224 | 1.17E-04 | 1.20E-07 | 0 |
| -1194 | 1.14E-04 | 2.09E-07 | 0 |
| -1164 | 1.11E-04 | 1.86E-07 | 0 |
| -1134 | 1.07E-04 | 1.64E-07 | 0 |
| -1104 | 1.04E-04 | 6.22E-08 | 0 |
| -1075 | 9.95E-05 | 1.84E-06 | 0 |
| -1045 | 9.72E-05 | 6.13E-07 | 0 |
| -1015 | 9.51E-05 | 8.74E-08 | 0 |
| -985  | 9.22E-05 | 2.15E-07 | 0 |
| -955  | 9.13E-05 | 7.21E-07 | 0 |
| -925  | 8.58E-05 | 2.05E-07 | 0 |
| -896  | 8.28E-05 | 9.77E-08 | 0 |



|      |           |          |   |
|------|-----------|----------|---|
| -866 | 8.07E-05  | 7.98E-07 | 1 |
| -836 | 7.69E-05  | 6.42E-07 | 0 |
| -806 | 7.38E-05  | 1.11E-07 | 0 |
| -776 | 7.14E-05  | 2.11E-07 | 0 |
| -746 | 6.83E-05  | 1.44E-07 | 0 |
| -716 | 6.57E-05  | 1.24E-07 | 0 |
| -687 | 6.22E-05  | 5.08E-08 | 0 |
| -657 | 5.53E-05  | 4.28E-06 | 0 |
| -627 | 5.61E-05  | 1.16E-06 | 0 |
| -597 | 5.18E-05  | 2.02E-06 | 0 |
| -567 | 5.14E-05  | 3.61E-07 | 0 |
| -537 | 4.78E-05  | 1.95E-07 | 0 |
| -507 | 4.47E-05  | 1.61E-07 | 0 |
| -478 | 4.15E-05  | 1.26E-07 | 0 |
| -448 | 3.92E-05  | 4.73E-07 | 0 |
| -418 | 3.63E-05  | 1.51E-07 | 0 |
| -388 | 3.34E-05  | 2.86E-07 | 0 |
| -358 | 3.05E-05  | 1.05E-07 | 0 |
| -328 | 2.76E-05  | 1.74E-07 | 0 |
| -299 | 2.54E-05  | 6.23E-07 | 0 |
| -269 | 2.31E-05  | 5.57E-07 | 0 |
| -239 | 6.54E-06  | 9.68E-06 | 0 |
| -209 | 1.63E-05  | 5.71E-08 | 0 |
| -179 | 1.41E-05  | 4.98E-07 | 0 |
| -149 | 1.17E-05  | 7.35E-07 | 0 |
| -119 | 8.69E-06  | 3.64E-07 | 0 |
| -90  | 6.05E-06  | 1.13E-07 | 0 |
| -60  | 3.04E-06  | 1.22E-07 | 0 |
| 0    | -1.97E-06 | 5.98E-07 | 0 |
| 0    | -6.40E-07 | 1.27E-06 | 1 |
| 30   | -4.70E-06 | 1.35E-07 | 0 |
| 60   | -7.19E-06 | 6.53E-08 | 0 |
| 90   | -8.83E-06 | 1.10E-06 | 0 |
| 119  | -1.08E-05 | 1.24E-06 | 0 |
| 149  | -1.38E-05 | 5.56E-07 | 0 |
| 179  | -1.68E-05 | 1.49E-07 | 0 |
| 209  | -2.03E-05 | 7.44E-08 | 0 |
| 239  | -2.26E-05 | 3.76E-07 | 0 |
| 269  | -2.63E-05 | 1.30E-06 | 0 |
| 299  | -2.79E-05 | 1.42E-07 | 0 |
| 328  | -3.02E-05 | 1.34E-07 | 0 |

|      |           |          |   |
|------|-----------|----------|---|
| 358  | -3.31E-05 | 1.29E-07 | 0 |
| 388  | -3.60E-05 | 1.45E-07 | 0 |
| 418  | -3.82E-05 | 1.22E-06 | 0 |
| 448  | -4.29E-05 | 1.58E-06 | 0 |
| 478  | -4.39E-05 | 2.82E-07 | 0 |
| 507  | -4.52E-05 | 3.53E-07 | 0 |
| 537  | -4.95E-05 | 7.79E-08 | 0 |
| 567  | -5.25E-05 | 4.31E-07 | 0 |
| 627  | -5.76E-05 | 2.56E-07 | 0 |
| 657  | -6.41E-05 | 6.78E-06 | 1 |
| 687  | -6.42E-05 | 5.77E-07 | 1 |
| 716  | -6.63E-05 | 7.23E-08 | 0 |
| 746  | -6.81E-05 | 6.48E-07 | 0 |
| 776  | -7.23E-05 | 1.76E-07 | 0 |
| 806  | -7.63E-05 | 1.94E-06 | 1 |
| 836  | -7.67E-05 | 5.72E-07 | 0 |
| 866  | -8.13E-05 | 3.93E-07 | 0 |
| 896  | -8.28E-05 | 7.03E-07 | 0 |
| 925  | -8.66E-05 | 3.83E-07 | 0 |
| 955  | -8.91E-05 | 6.70E-07 | 0 |
| 985  | -8.95E-05 | 1.41E-06 | 0 |
| 1015 | -9.47E-05 | 1.10E-06 | 0 |
| 1045 | -9.69E-05 | 5.94E-07 | 0 |
| 1075 | -1.02E-04 | 3.83E-07 | 0 |
| 1104 | -1.04E-04 | 1.64E-06 | 0 |
| 1134 | -1.06E-04 | 2.11E-06 | 0 |
| 1164 | -1.10E-04 | 2.73E-06 | 0 |
| 1194 | -1.13E-04 | 1.91E-06 | 0 |
| 1224 | -1.16E-04 | 1.68E-06 | 0 |
| 1254 | -1.20E-04 | 1.20E-06 | 0 |
| 1284 | -1.24E-04 | 2.60E-06 | 0 |
| 1313 | -1.21E-04 | 6.87E-06 | 0 |
| 1343 | -1.27E-04 | 5.86E-06 | 1 |
| 1373 | -1.35E-04 | 2.89E-06 | 0 |
| 1403 | -1.34E-04 | 2.18E-06 | 0 |
| 1433 | -1.38E-04 | 1.72E-06 | 0 |
| 1463 | -1.42E-04 | 3.04E-06 | 0 |
| 1493 | -1.49E-04 | 5.44E-06 | 0 |
| 1522 | -1.39E-04 | 6.79E-06 | 0 |
| 1552 | -1.49E-04 | 1.08E-05 | 0 |
| 1582 | -1.41E-04 | 9.39E-06 | 0 |

|      |           |          |   |
|------|-----------|----------|---|
| 1612 | -1.64E-04 | 6.14E-06 | 0 |
| 1642 | -1.58E-04 | 2.84E-06 | 0 |
| 1672 | -1.56E-04 | 8.39E-06 | 0 |
| 1701 | -1.65E-04 | 6.42E-06 | 0 |
| 1731 | -1.76E-04 | 1.18E-05 | 0 |
| 1761 | -1.64E-04 | 1.10E-05 | 0 |
| 1791 | -1.72E-04 | 2.47E-06 | 0 |
| 1821 | -1.78E-04 | 3.55E-06 | 0 |
| 1851 | -1.86E-04 | 2.86E-06 | 0 |
| 1881 | -1.87E-04 | 8.71E-06 | 0 |
| 1910 | -2.13E-04 | 1.80E-05 | 0 |
| 1940 | -1.96E-04 | 4.56E-06 | 0 |
| 1970 | -1.98E-04 | 6.40E-06 | 0 |
| 2000 | -1.95E-04 | 5.23E-06 | 0 |









### Abdomen Pellet # 4

| Applied Magnetic Field<br>(Oe) | Average Magnetic Moment<br>(emu) | standard error<br>(emu) | # outliers<br>(>2 sigma) |
|--------------------------------|----------------------------------|-------------------------|--------------------------|
| 0                              | 2.76E-06                         | 1.18E-07                | 0                        |
| 40                             | -3.70E-07                        | 8.73E-08                | 0                        |
| 80                             | -3.91E-06                        | 8.27E-08                | 0                        |
| 120                            | -7.53E-06                        | 4.23E-07                | 0                        |
| 160                            | -1.03E-05                        | 1.26E-07                | 0                        |
| 200                            | -1.36E-05                        | 5.34E-08                | 0                        |
| 240                            | -1.67E-05                        | 6.21E-08                | 0                        |
| 280                            | -1.97E-05                        | 1.26E-07                | 0                        |
| 320                            | -2.35E-05                        | 2.41E-07                | 0                        |
| 360                            | -2.67E-05                        | 2.86E-07                | 0                        |
| 400                            | -2.98E-05                        | 1.09E-07                | 0                        |
| 440                            | -3.31E-05                        | 1.66E-08                | 0                        |
| 480                            | -3.59E-05                        | 4.30E-07                | 0                        |
| 520                            | -3.95E-05                        | 6.80E-08                | 0                        |
| 560                            | -4.36E-05                        | 7.12E-07                | 0                        |
| 600                            | -4.59E-05                        | 2.95E-07                | 0                        |
| 640                            | -4.94E-05                        | 8.17E-08                | 0                        |
| 680                            | -5.26E-05                        | 2.03E-07                | 0                        |
| 720                            | -5.61E-05                        | 4.05E-07                | 0                        |
| 760                            | -5.99E-05                        | 2.04E-07                | 0                        |
| 800                            | -6.29E-05                        | 1.93E-07                | 0                        |
| 840                            | -6.65E-05                        | 5.74E-08                | 0                        |
| 880                            | -6.59E-05                        | 3.68E-06                | 0                        |
| 920                            | -7.30E-05                        | 4.14E-07                | 0                        |
| 960                            | -7.23E-05                        | 1.99E-06                | 0                        |
| 1000                           | -8.05E-05                        | 2.55E-07                | 0                        |
| 1040                           | -8.32E-05                        | 8.48E-08                | 0                        |
| 1080                           | -8.65E-05                        | 1.22E-07                | 0                        |
| 1120                           | -9.05E-05                        | 7.68E-08                | 0                        |
| 1160                           | -9.37E-05                        | 3.76E-08                | 0                        |
| 1200                           | -9.73E-05                        | 7.75E-08                | 0                        |
| 1240                           | -1.02E-04                        | 6.74E-07                | 0                        |
| 1280                           | -1.03E-04                        | 2.04E-06                | 0                        |
| 1320                           | -1.07E-04                        | 5.92E-07                | 0                        |
| 1360                           | -1.15E-04                        | 1.88E-06                | 0                        |
| 1400                           | -1.15E-04                        | 6.01E-07                | 0                        |
| 1440                           | -1.17E-04                        | 1.08E-06                | 0                        |



|      |           |          |   |
|------|-----------|----------|---|
| 1480 | -1.22E-04 | 6.60E-07 | 0 |
| 1520 | -1.27E-04 | 4.91E-07 | 0 |
| 1560 | -1.29E-04 | 6.10E-07 | 0 |
| 1600 | -1.33E-04 | 9.15E-07 | 0 |
| 1640 | -1.35E-04 | 8.49E-07 | 0 |
| 1680 | -1.36E-04 | 3.17E-06 | 0 |
| 1720 | -1.45E-04 | 2.55E-06 | 0 |
| 1760 | -1.49E-04 | 7.32E-07 | 0 |
| 1800 | -1.51E-04 | 3.28E-06 | 0 |
| 1840 | -1.49E-04 | 2.08E-06 | 0 |
| 1880 | -1.57E-04 | 2.38E-06 | 0 |
| 1920 | -1.61E-04 | 1.40E-06 | 0 |
| 1960 | -1.63E-04 | 1.19E-06 | 0 |
| 2000 | -1.70E-04 | 1.97E-06 | 0 |
| 1960 | -1.67E-04 | 6.42E-07 | 0 |
| 1920 | -1.62E-04 | 4.03E-07 | 0 |
| 1880 | -1.58E-04 | 2.56E-07 | 0 |
| 1840 | -1.54E-04 | 1.07E-07 | 0 |
| 1800 | -1.51E-04 | 1.33E-07 | 0 |
| 1760 | -1.48E-04 | 1.99E-07 | 0 |
| 1720 | -1.43E-04 | 4.14E-07 | 0 |
| 1680 | -1.40E-04 | 2.10E-07 | 0 |
| 1640 | -1.36E-04 | 8.61E-08 | 0 |
| 1600 | -1.32E-04 | 3.95E-07 | 0 |
| 1560 | -1.29E-04 | 1.90E-07 | 0 |
| 1520 | -1.25E-04 | 5.13E-07 | 0 |
| 1480 | -1.22E-04 | 8.84E-08 | 0 |
| 1440 | -1.18E-04 | 1.14E-07 | 0 |
| 1400 | -1.15E-04 | 3.77E-07 | 0 |
| 1360 | -1.11E-04 | 7.44E-07 | 0 |
| 1320 | -1.07E-04 | 1.46E-07 | 0 |
| 1280 | -1.04E-04 | 3.30E-08 | 0 |
| 1240 | -1.00E-04 | 6.27E-08 | 0 |
| 1200 | -9.83E-05 | 4.66E-06 | 0 |
| 1160 | -9.40E-05 | 4.41E-07 | 0 |
| 1120 | -9.20E-05 | 1.93E-06 | 0 |
| 1080 | -8.62E-05 | 1.69E-07 | 0 |
| 1040 | -8.33E-05 | 1.75E-07 | 0 |
| 1000 | -7.86E-05 | 7.79E-07 | 0 |
| 960  | -7.57E-05 | 6.80E-07 | 0 |
| 920  | -7.21E-05 | 3.86E-07 | 0 |

|      |           |          |   |
|------|-----------|----------|---|
| 880  | -6.89E-05 | 7.18E-08 | 0 |
| 840  | -6.54E-05 | 9.68E-07 | 0 |
| 800  | -6.28E-05 | 1.99E-06 | 0 |
| 760  | -5.53E-05 | 2.72E-06 | 0 |
| 720  | -5.55E-05 | 3.65E-07 | 0 |
| 680  | -5.28E-05 | 5.31E-07 | 0 |
| 640  | -4.86E-05 | 5.57E-07 | 0 |
| 600  | -4.48E-05 | 2.34E-07 | 0 |
| 560  | -4.17E-05 | 3.33E-07 | 0 |
| 520  | -3.84E-05 | 1.37E-07 | 0 |
| 480  | -3.52E-05 | 1.90E-07 | 0 |
| 440  | -3.23E-05 | 4.81E-06 | 0 |
| 400  | -2.97E-05 | 6.44E-07 | 0 |
| 360  | -2.17E-05 | 3.14E-06 | 0 |
| 320  | -2.10E-05 | 1.24E-06 | 0 |
| 280  | -2.00E-05 | 8.05E-07 | 0 |
| 240  | -1.74E-05 | 8.03E-07 | 0 |
| 200  | -1.37E-05 | 6.53E-07 | 0 |
| 160  | -9.37E-06 | 2.84E-07 | 0 |
| 120  | -6.54E-06 | 1.89E-07 | 0 |
| 80   | -4.35E-07 | 2.74E-06 | 0 |
| 40   | -3.19E-06 | 2.42E-06 | 0 |
| 0    | 2.48E-06  | 3.30E-07 | 0 |
| -40  | 4.20E-06  | 7.07E-07 | 0 |
| -80  | 8.28E-06  | 4.33E-07 | 0 |
| -120 | 1.11E-05  | 3.09E-07 | 0 |
| -160 | 1.45E-05  | 1.16E-07 | 0 |
| -200 | 1.71E-05  | 1.17E-07 | 0 |
| -240 | 2.29E-05  | 1.37E-06 | 0 |
| -280 | 1.00E-05  | 1.16E-05 | 0 |
| -320 | 2.57E-05  | 4.06E-07 | 0 |
| -360 | 2.93E-05  | 7.86E-06 | 0 |
| -400 | 3.24E-05  | 1.33E-07 | 0 |
| -440 | 3.57E-05  | 1.67E-07 | 0 |
| -480 | 3.87E-05  | 1.97E-07 | 0 |
| -520 | 4.38E-05  | 2.06E-06 | 0 |
| -560 | 4.49E-05  | 1.80E-07 | 0 |
| -600 | 4.73E-05  | 2.50E-07 | 0 |
| -640 | 4.94E-05  | 4.32E-07 | 0 |
| -680 | 5.46E-05  | 2.67E-07 | 0 |
| -720 | 5.80E-05  | 9.28E-08 | 0 |

|       |          |          |   |
|-------|----------|----------|---|
| -760  | 6.10E-05 | 2.94E-07 | 0 |
| -800  | 6.58E-05 | 1.42E-06 | 0 |
| -840  | 6.40E-05 | 4.32E-06 | 0 |
| -880  | 7.08E-05 | 4.16E-07 | 0 |
| -920  | 7.15E-05 | 1.46E-06 | 0 |
| -960  | 7.70E-05 | 1.93E-07 | 0 |
| -1000 | 8.27E-05 | 8.07E-07 | 0 |
| -1040 | 8.36E-05 | 1.06E-06 | 0 |
| -1080 | 8.79E-05 | 1.04E-06 | 0 |
| -1120 | 9.25E-05 | 3.29E-06 | 0 |
| -1160 | 9.79E-05 | 3.83E-06 | 0 |
| -1200 | 9.24E-05 | 4.91E-06 | 0 |
| -1240 | 1.10E-04 | 5.31E-06 | 0 |
| -1280 | 1.04E-04 | 1.44E-06 | 0 |
| -1320 | 1.14E-04 | 5.38E-06 | 0 |
| -1360 | 1.15E-04 | 8.13E-06 | 0 |
| -1400 | 1.10E-04 | 2.98E-06 | 0 |
| -1440 | 5.93E-05 | 4.67E-05 | 0 |
| -1480 | 1.28E-04 | 1.61E-05 | 0 |
| -1520 | 1.15E-04 | 5.34E-06 | 0 |
| -1560 | 1.29E-04 | 1.13E-06 | 0 |
| -1600 | 1.16E-04 | 7.53E-06 | 0 |
| -1640 | 1.49E-04 | 3.73E-06 | 0 |
| -1680 | 1.38E-04 | 1.34E-05 | 0 |
| -1720 | 1.34E-04 | 1.10E-05 | 0 |
| -1760 | 1.22E-04 | 1.35E-05 | 0 |
| -1800 | 1.51E-04 | 7.70E-06 | 0 |
| -1840 | 1.64E-04 | 1.35E-05 | 0 |
| -1880 | 1.59E-04 | 2.23E-06 | 0 |
| -1920 | 1.59E-04 | 3.27E-06 | 0 |
| -1960 | 1.65E-04 | 5.33E-06 | 0 |
| -2000 | 1.64E-04 | 1.27E-05 | 0 |
| -1960 | 1.66E-04 | 2.28E-07 | 0 |
| -1920 | 1.62E-04 | 3.21E-08 | 0 |
| -1880 | 1.59E-04 | 5.67E-07 | 0 |
| -1840 | 1.55E-04 | 3.51E-07 | 0 |
| -1800 | 1.52E-04 | 6.77E-08 | 0 |
| -1760 | 1.47E-04 | 7.34E-08 | 0 |
| -1720 | 1.44E-04 | 1.01E-07 | 0 |
| -1680 | 1.40E-04 | 4.75E-07 | 0 |
| -1640 | 1.37E-04 | 1.16E-07 | 0 |

|       |          |          |   |
|-------|----------|----------|---|
| -1600 | 1.32E-04 | 2.62E-07 | 0 |
| -1560 | 1.29E-04 | 1.45E-07 | 0 |
| -1520 | 1.26E-04 | 6.11E-08 | 0 |
| -1480 | 1.22E-04 | 2.08E-07 | 0 |
| -1440 | 1.18E-04 | 9.07E-07 | 0 |
| -1400 | 1.15E-04 | 9.53E-08 | 0 |
| -1360 | 1.12E-04 | 2.01E-08 | 0 |
| -1320 | 1.08E-04 | 4.94E-08 | 0 |
| -1280 | 1.03E-04 | 1.56E-06 | 0 |
| -1240 | 1.01E-04 | 1.81E-07 | 0 |
| -1200 | 9.73E-05 | 1.46E-07 | 0 |
| -1160 | 9.36E-05 | 6.70E-08 | 0 |
| -1120 | 9.07E-05 | 1.19E-07 | 0 |
| -1080 | 8.60E-05 | 1.12E-06 | 0 |
| -1040 | 8.35E-05 | 1.62E-07 | 0 |
| -1000 | 8.04E-05 | 2.44E-07 | 0 |
| -960  | 7.62E-05 | 8.58E-08 | 0 |
| -920  | 7.24E-05 | 4.82E-07 | 0 |
| -880  | 7.09E-05 | 2.34E-06 | 0 |
| -840  | 6.52E-05 | 2.10E-06 | 0 |
| -800  | 6.34E-05 | 8.45E-07 | 0 |
| -760  | 6.00E-05 | 4.21E-07 | 0 |
| -720  | 5.57E-05 | 4.41E-07 | 0 |
| -680  | 5.03E-05 | 3.95E-06 | 0 |
| -640  | 4.94E-05 | 2.69E-07 | 0 |
| -600  | 4.62E-05 | 2.41E-07 | 0 |
| -560  | 4.25E-05 | 1.25E-07 | 0 |
| -520  | 3.93E-05 | 9.36E-07 | 0 |
| -480  | 3.62E-05 | 3.88E-07 | 0 |
| -440  | 3.33E-05 | 4.17E-07 | 0 |
| -400  | 2.98E-05 | 5.88E-07 | 0 |
| -360  | 2.71E-05 | 2.24E-07 | 0 |
| -320  | 2.29E-05 | 3.02E-07 | 0 |
| -280  | 2.00E-05 | 2.43E-07 | 0 |
| -240  | 1.65E-05 | 7.12E-07 | 0 |
| -200  | 1.20E-05 | 4.56E-06 | 0 |
| -160  | 1.06E-05 | 3.12E-07 | 0 |
| -120  | 8.23E-06 | 4.59E-07 | 0 |
| -80   | 5.02E-06 | 6.29E-07 | 0 |
| -40   | 2.69E-07 | 7.23E-07 | 0 |
| 0     | 3.44E-06 | 5.34E-06 | 0 |

|      |           |          |   |
|------|-----------|----------|---|
| 40   | 6.80E-06  | 5.37E-06 | 0 |
| 80   | -1.38E-05 | 7.86E-06 | 0 |
| 120  | -1.19E-05 | 7.52E-06 | 0 |
| 160  | -1.27E-05 | 3.27E-07 | 0 |
| 200  | -2.58E-05 | 8.44E-06 | 0 |
| 240  | -1.94E-05 | 4.76E-07 | 0 |
| 280  | -2.24E-05 | 4.42E-08 | 0 |
| 320  | -2.34E-05 | 1.72E-06 | 0 |
| 360  | -2.70E-05 | 1.90E-06 | 0 |
| 400  | -3.05E-05 | 6.59E-07 | 0 |
| 440  | -2.92E-05 | 1.95E-05 | 0 |
| 480  | -3.73E-05 | 4.17E-07 | 0 |
| 520  | -4.10E-05 | 4.63E-08 | 0 |
| 560  | -4.36E-05 | 1.69E-07 | 0 |
| 600  | -4.66E-05 | 1.25E-06 | 0 |
| 640  | -5.07E-05 | 2.83E-06 | 0 |
| 680  | -5.23E-05 | 4.03E-07 | 0 |
| 720  | -5.69E-05 | 1.82E-07 | 0 |
| 760  | -5.93E-05 | 1.43E-07 | 0 |
| 800  | -6.33E-05 | 3.44E-07 | 0 |
| 840  | -6.66E-05 | 2.94E-07 | 0 |
| 880  | -6.95E-05 | 1.78E-07 | 0 |
| 920  | -7.40E-05 | 6.98E-07 | 0 |
| 960  | -7.64E-05 | 6.30E-06 | 0 |
| 1000 | -7.86E-05 | 4.77E-07 | 0 |
| 1040 | -8.88E-05 | 7.71E-06 | 0 |
| 1080 | -8.61E-05 | 2.04E-06 | 0 |
| 1120 | -8.68E-05 | 6.74E-07 | 0 |
| 1160 | -9.42E-05 | 3.72E-06 | 0 |
| 1200 | -9.44E-05 | 1.85E-06 | 0 |
| 1240 | -1.04E-04 | 2.19E-06 | 0 |
| 1280 | -1.02E-04 | 8.90E-06 | 0 |
| 1320 | -1.12E-04 | 4.29E-06 | 0 |
| 1400 | -1.11E-04 | 1.74E-06 | 0 |
| 1440 | -1.17E-04 | 3.17E-06 | 0 |
| 1480 | -1.27E-04 | 1.32E-05 | 0 |
| 1520 | -1.22E-04 | 9.43E-06 | 0 |
| 1560 | -1.26E-04 | 4.64E-06 | 0 |
| 1600 | -1.36E-04 | 1.19E-05 | 0 |
| 1640 | -1.45E-04 | 3.85E-06 | 0 |
| 1680 | -1.40E-04 | 2.65E-06 | 0 |

|      |           |          |   |
|------|-----------|----------|---|
| 1720 | -1.34E-04 | 5.61E-06 | 0 |
| 1760 | -1.54E-04 | 3.26E-06 | 0 |
| 1800 | -1.57E-04 | 4.25E-06 | 0 |
| 1840 | -1.64E-04 | 1.77E-05 | 0 |
| 1880 | -1.84E-04 | 7.17E-06 | 0 |
| 1920 | -1.63E-04 | 1.78E-05 | 0 |
| 1960 | -1.75E-04 | 5.68E-06 | 0 |
| 2000 | -1.62E-04 | 3.37E-06 | 0 |
