# Supplementary material for: Linking magnetite in the abdomen of honey bees to a magnetoreceptive function
Source: PubMed Central journal article supplement (PMC5378088; doi:10.1098/rspb.2016.2873), 2017-03-22
Supplement: rspb20162873supp2.pdf [file rspb20162873supp2.pdf]

## Head Pellet # 1

| Applied Magnetic Field<br>(Oe) | Average Magnetic Moment<br>(emu) | standard error<br>(emu) | # outliers<br>(>2 sigma) |
|--------------------------------|----------------------------------|-------------------------|--------------------------|
| 0                              | 1.01E-05                         | 4.70E-06                | 0                        |
| 40                             | -1.80E-05                        | 3.97E-06                | 0                        |
| 80                             | -6.53E-06                        | 7.97E-08                | 0                        |
| 120                            | -6.84E-06                        | 4.20E-06                | 0                        |
| 160                            | -1.46E-05                        | 1.42E-07                | 0                        |
| 200                            | -1.89E-05                        | 5.69E-08                | 0                        |
| 240                            | -2.29E-05                        | 8.03E-08                | 0                        |
| 280                            | -2.72E-05                        | 2.11E-07                | 0                        |
| 320                            | -3.12E-05                        | 1.78E-07                | 0                        |
| 360                            | -3.56E-05                        | 9.77E-08                | 0                        |
| 400                            | -3.97E-05                        | 4.82E-08                | 0                        |
| 440                            | -4.40E-05                        | 3.85E-07                | 0                        |
| 480                            | -4.83E-05                        | 1.46E-07                | 0                        |
| 520                            | -5.23E-05                        | 2.98E-07                | 0                        |
| 560                            | -5.62E-05                        | 6.62E-08                | 0                        |
| 600                            | -6.02E-05                        | 1.19E-07                | 0                        |
| 640                            | -6.52E-05                        | 1.42E-07                | 0                        |
| 680                            | -6.88E-05                        | 2.02E-07                | 0                        |
| 720                            | -7.31E-05                        | 4.91E-08                | 0                        |
| 760                            | -7.98E-05                        | 2.55E-06                | 0                        |
| 800                            | -8.23E-05                        | 3.40E-07                | 0                        |
| 840                            | -8.51E-05                        | 6.66E-07                | 0                        |
| 880                            | -9.18E-05                        | 9.12E-07                | 0                        |
| 920                            | -9.39E-05                        | 2.21E-07                | 0                        |
| 960                            | -9.82E-05                        | 2.35E-07                | 0                        |
| 1000                           | -1.03E-04                        | 3.20E-07                | 0                        |
| 1040                           | -1.07E-04                        | 2.47E-07                | 0                        |
| 1080                           | -1.11E-04                        | 1.75E-07                | 0                        |
| 1120                           | -1.15E-04                        | 8.28E-07                | 0                        |
| 1160                           | -1.20E-04                        | 3.96E-07                | 0                        |
| 1200                           | -1.21E-04                        | 1.03E-06                | 0                        |
| 1240                           | -1.28E-04                        | 3.12E-07                | 0                        |
| 1280                           | -1.33E-04                        | 4.09E-07                | 0                        |
| 1320                           | -1.36E-04                        | 4.46E-07                | 0                        |
| 1360                           | -1.41E-04                        | 3.91E-07                | 0                        |
| 1400                           | -1.46E-04                        | 1.46E-07                | 0                        |
| 1440                           | -1.52E-04                        | 2.19E-06                | 0                        |

|      |           |          |   |
|------|-----------|----------|---|
| 1480 | -1.56E-04 | 2.45E-06 | 0 |
| 1520 | -1.62E-04 | 5.25E-06 | 0 |
| 1560 | -1.62E-04 | 9.30E-07 | 0 |
| 1600 | -1.69E-04 | 3.57E-06 | 0 |
| 1640 | -1.72E-04 | 1.06E-06 | 0 |
| 1680 | -1.76E-04 | 1.16E-06 | 0 |
| 1720 | -1.80E-04 | 4.72E-07 | 0 |
| 1760 | -1.83E-04 | 9.50E-07 | 0 |
| 1800 | -1.85E-04 | 3.85E-06 | 0 |
| 1840 | -1.94E-04 | 8.91E-07 | 0 |
| 1880 | -2.03E-04 | 5.56E-06 | 0 |
| 1920 | -2.01E-04 | 1.66E-06 | 0 |
| 1960 | -2.06E-04 | 2.33E-06 | 0 |
| 2000 | -2.08E-04 | 1.69E-06 | 0 |
| 1960 | -2.06E-04 | 4.12E-07 | 0 |
| 1920 | -2.01E-04 | 1.77E-07 | 0 |
| 1880 | -1.97E-04 | 9.43E-08 | 0 |
| 1840 | -1.93E-04 | 9.02E-08 | 0 |
| 1800 | -1.88E-04 | 2.11E-07 | 0 |
| 1760 | -1.84E-04 | 1.56E-07 | 0 |
| 1720 | -1.82E-04 | 2.47E-06 | 0 |
| 1680 | -1.75E-04 | 7.20E-08 | 0 |
| 1640 | -1.71E-04 | 1.66E-07 | 0 |
| 1600 | -1.66E-04 | 2.69E-07 | 0 |
| 1560 | -1.62E-04 | 1.82E-07 | 0 |
| 1520 | -1.58E-04 | 5.30E-08 | 0 |
| 1480 | -1.54E-04 | 2.26E-07 | 0 |
| 1440 | -1.50E-04 | 8.12E-07 | 0 |
| 1400 | -1.46E-04 | 7.31E-07 | 0 |
| 1360 | -1.41E-04 | 5.77E-08 | 0 |
| 1320 | -1.36E-04 | 5.13E-07 | 0 |
| 1280 | -1.32E-04 | 3.03E-07 | 0 |
| 1240 | -1.28E-04 | 3.00E-07 | 0 |
| 1200 | -1.24E-04 | 7.87E-08 | 0 |
| 1160 | -1.20E-04 | 9.79E-08 | 0 |
| 1120 | -1.15E-04 | 1.50E-07 | 0 |
| 1080 | -1.11E-04 | 3.21E-07 | 0 |
| 1040 | -1.09E-04 | 1.97E-06 | 0 |
| 1000 | -1.03E-04 | 2.02E-07 | 0 |
| 960  | -9.84E-05 | 1.88E-07 | 0 |
| 920  | -9.50E-05 | 3.58E-07 | 0 |

|      |           |          |   |
|------|-----------|----------|---|
| 880  | -8.93E-05 | 1.80E-07 | 0 |
| 840  | -8.55E-05 | 7.64E-08 | 0 |
| 800  | -8.17E-05 | 2.18E-06 | 0 |
| 760  | -7.76E-05 | 3.02E-07 | 0 |
| 720  | -7.09E-05 | 2.99E-06 | 0 |
| 680  | -6.90E-05 | 4.22E-07 | 0 |
| 640  | -6.49E-05 | 3.57E-07 | 0 |
| 600  | -6.20E-05 | 4.83E-07 | 0 |
| 560  | -5.55E-05 | 2.24E-07 | 0 |
| 520  | -5.19E-05 | 4.83E-07 | 0 |
| 480  | -4.79E-05 | 1.86E-07 | 0 |
| 440  | -3.87E-05 | 5.30E-06 | 0 |
| 400  | -3.75E-05 | 2.12E-06 | 0 |
| 360  | -3.76E-05 | 6.17E-06 | 0 |
| 320  | -3.26E-05 | 9.84E-07 | 0 |
| 280  | -2.83E-05 | 5.35E-07 | 0 |
| 240  | -2.47E-05 | 8.58E-07 | 0 |
| 200  | -1.75E-05 | 6.42E-07 | 0 |
| 160  | -1.52E-05 | 2.79E-07 | 0 |
| 120  | -1.07E-05 | 1.41E-07 | 0 |
| 80   | -3.89E-06 | 2.69E-06 | 0 |
| 40   | 4.78E-06  | 7.48E-06 | 0 |
| 0    | 4.54E-06  | 3.99E-06 | 0 |
| -40  | 6.97E-06  | 1.59E-06 | 0 |
| -80  | 8.36E-06  | 2.85E-07 | 0 |
| -120 | 1.35E-05  | 1.17E-07 | 0 |
| -160 | 1.75E-05  | 7.42E-08 | 0 |
| -200 | 2.06E-05  | 3.69E-07 | 0 |
| -240 | 2.50E-05  | 4.47E-07 | 0 |
| -280 | 2.84E-05  | 5.51E-07 | 0 |
| -320 | 3.26E-05  | 4.88E-07 | 0 |
| -360 | 3.76E-05  | 1.02E-07 | 0 |
| -400 | 4.19E-05  | 3.18E-07 | 0 |
| -440 | 4.60E-05  | 1.46E-07 | 0 |
| -480 | 5.58E-05  | 5.79E-06 | 0 |
| -520 | 5.15E-05  | 3.48E-06 | 0 |
| -560 | 5.81E-05  | 3.60E-07 | 0 |
| -600 | 6.13E-05  | 5.56E-07 | 0 |
| -640 | 6.53E-05  | 5.40E-07 | 0 |
| -680 | 7.07E-05  | 3.43E-07 | 0 |
| -720 | 7.48E-05  | 9.77E-08 | 0 |

|       |          |          |   |
|-------|----------|----------|---|
| -760  | 8.20E-05 | 7.95E-07 | 0 |
| -800  | 8.69E-05 | 1.26E-05 | 0 |
| -840  | 8.53E-05 | 3.21E-07 | 0 |
| -880  | 9.06E-05 | 5.53E-07 | 0 |
| -920  | 9.45E-05 | 1.00E-06 | 0 |
| -960  | 1.01E-04 | 1.03E-06 | 0 |
| -1000 | 1.04E-04 | 5.99E-07 | 0 |
| -1040 | 1.09E-04 | 6.55E-07 | 0 |
| -1080 | 1.07E-04 | 7.67E-07 | 0 |
| -1120 | 1.18E-04 | 1.99E-06 | 0 |
| -1160 | 1.21E-04 | 3.53E-06 | 0 |
| -1200 | 1.29E-04 | 2.73E-06 | 0 |
| -1240 | 1.37E-04 | 2.47E-06 | 0 |
| -1280 | 1.28E-04 | 3.34E-06 | 0 |
| -1320 | 1.37E-04 | 5.14E-06 | 0 |
| -1360 | 1.37E-04 | 2.30E-06 | 0 |
| -1400 | 1.34E-04 | 5.80E-06 | 0 |
| -1440 | 1.52E-04 | 9.93E-06 | 0 |
| -1480 | 1.70E-04 | 8.88E-06 | 0 |
| -1520 | 1.52E-04 | 9.76E-06 | 0 |
| -1560 | 1.58E-04 | 9.73E-06 | 0 |
| -1600 | 1.62E-04 | 2.42E-06 | 0 |
| -1640 | 1.68E-04 | 5.81E-06 | 0 |
| -1680 | 1.82E-04 | 3.65E-06 | 0 |
| -1720 | 1.74E-04 | 5.84E-06 | 0 |
| -1760 | 2.00E-04 | 5.49E-06 | 0 |
| -1800 | 1.86E-04 | 1.26E-05 | 0 |
| -1840 | 1.92E-04 | 8.98E-06 | 0 |
| -1880 | 1.90E-04 | 4.24E-06 | 0 |
| -1920 | 1.98E-04 | 3.94E-06 | 0 |
| -1960 | 2.07E-04 | 7.18E-06 | 0 |
| -2000 | 2.23E-04 | 7.53E-06 | 0 |
| -1960 | 2.07E-04 | 8.45E-08 | 0 |
| -1920 | 2.02E-04 | 1.24E-07 | 0 |
| -1880 | 1.98E-04 | 2.14E-08 | 0 |
| -1840 | 1.94E-04 | 1.79E-07 | 0 |
| -1800 | 1.90E-04 | 3.69E-07 | 0 |
| -1760 | 1.85E-04 | 1.96E-07 | 0 |
| -1720 | 1.81E-04 | 5.37E-08 | 0 |
| -1680 | 1.76E-04 | 2.32E-07 | 0 |
| -1640 | 1.72E-04 | 1.83E-07 | 0 |

|       |           |          |   |
|-------|-----------|----------|---|
| -1600 | 1.67E-04  | 3.53E-07 | 0 |
| -1560 | 1.64E-04  | 1.74E-07 | 0 |
| -1520 | 1.59E-04  | 3.30E-08 | 0 |
| -1480 | 1.55E-04  | 1.67E-07 | 0 |
| -1440 | 1.51E-04  | 6.15E-08 | 0 |
| -1400 | 1.46E-04  | 1.00E-07 | 0 |
| -1360 | 1.42E-04  | 5.88E-07 | 0 |
| -1320 | 1.38E-04  | 2.71E-07 | 0 |
| -1280 | 1.33E-04  | 1.47E-07 | 0 |
| -1240 | 1.29E-04  | 1.93E-07 | 0 |
| -1200 | 1.26E-04  | 3.25E-07 | 0 |
| -1160 | 1.21E-04  | 4.14E-07 | 0 |
| -1120 | 1.16E-04  | 4.13E-07 | 0 |
| -1080 | 1.12E-04  | 7.77E-08 | 0 |
| -1040 | 1.09E-04  | 1.02E-06 | 0 |
| -1000 | 1.03E-04  | 2.61E-07 | 0 |
| -960  | 9.87E-05  | 6.91E-07 | 0 |
| -920  | 9.55E-05  | 1.13E-07 | 0 |
| -880  | 9.11E-05  | 6.39E-07 | 0 |
| -840  | 8.66E-05  | 3.60E-07 | 0 |
| -800  | 8.27E-05  | 2.04E-07 | 0 |
| -760  | 7.80E-05  | 1.49E-07 | 0 |
| -720  | 7.36E-05  | 6.42E-07 | 0 |
| -680  | 7.05E-05  | 6.04E-07 | 0 |
| -640  | 6.63E-05  | 1.46E-07 | 0 |
| -600  | 6.15E-05  | 4.65E-07 | 0 |
| -560  | 5.74E-05  | 2.38E-07 | 0 |
| -520  | 5.33E-05  | 1.76E-07 | 0 |
| -480  | 4.88E-05  | 1.69E-07 | 0 |
| -440  | 4.28E-05  | 1.63E-06 | 0 |
| -400  | 4.03E-05  | 8.57E-07 | 0 |
| -360  | 2.68E-05  | 1.36E-05 | 0 |
| -320  | 3.29E-05  | 4.54E-07 | 0 |
| -280  | 2.64E-05  | 5.81E-06 | 0 |
| -240  | 2.41E-05  | 8.01E-08 | 0 |
| -200  | 2.02E-05  | 1.63E-07 | 0 |
| -160  | 1.66E-05  | 6.75E-07 | 0 |
| -120  | 1.19E-05  | 1.04E-07 | 0 |
| -80   | 8.25E-06  | 3.35E-07 | 0 |
| -40   | 1.46E-06  | 3.44E-06 | 0 |
| 0     | -3.35E-06 | 3.38E-06 | 0 |

|      |           |          |   |
|------|-----------|----------|---|
| 40   | -4.26E-06 | 9.32E-08 | 0 |
| 80   | -8.66E-06 | 1.53E-06 | 0 |
| 120  | -1.23E-05 | 4.49E-07 | 0 |
| 160  | -1.59E-05 | 5.01E-07 | 0 |
| 200  | -1.46E-05 | 1.68E-06 | 0 |
| 240  | -2.39E-05 | 3.86E-07 | 0 |
| 280  | -2.87E-05 | 1.03E-07 | 0 |
| 320  | -3.19E-05 | 1.71E-07 | 0 |
| 360  | -3.57E-05 | 1.32E-06 | 0 |
| 400  | -4.06E-05 | 2.09E-07 | 0 |
| 440  | -4.38E-05 | 3.40E-07 | 0 |
| 480  | -4.68E-05 | 1.28E-06 | 0 |
| 520  | -5.58E-05 | 2.60E-06 | 0 |
| 560  | -5.68E-05 | 1.99E-07 | 0 |
| 600  | -6.16E-05 | 9.96E-07 | 0 |
| 640  | -6.46E-05 | 7.80E-07 | 0 |
| 680  | -6.79E-05 | 2.80E-07 | 0 |
| 720  | -7.25E-05 | 2.90E-07 | 0 |
| 760  | -7.83E-05 | 4.48E-07 | 0 |
| 800  | -8.20E-05 | 1.15E-07 | 0 |
| 840  | -8.82E-05 | 9.72E-07 | 0 |
| 880  | -9.13E-05 | 1.30E-05 | 0 |
| 920  | -9.15E-05 | 1.79E-06 | 0 |
| 960  | -9.83E-05 | 6.09E-07 | 0 |
| 1000 | -1.03E-04 | 6.31E-07 | 0 |
| 1040 | -1.08E-04 | 4.17E-07 | 0 |
| 1080 | -1.13E-04 | 5.68E-07 | 0 |
| 1120 | -1.14E-04 | 1.97E-06 | 0 |
| 1160 | -1.22E-04 | 3.34E-06 | 0 |
| 1200 | -1.27E-04 | 4.92E-06 | 0 |
| 1240 | -1.25E-04 | 2.26E-06 | 0 |
| 1280 | -1.32E-04 | 3.17E-07 | 0 |
| 1320 | -1.33E-04 | 1.78E-06 | 0 |
| 1360 | -1.35E-04 | 7.74E-06 | 0 |
| 1400 | -1.42E-04 | 9.75E-06 | 0 |
| 1440 | -1.55E-04 | 7.21E-06 | 0 |
| 1480 | -1.48E-04 | 8.84E-06 | 0 |
| 1520 | -1.70E-04 | 4.93E-06 | 0 |
| 1560 | -1.81E-04 | 1.26E-05 | 0 |
| 1600 | -1.60E-04 | 4.68E-06 | 0 |
| 1640 | -1.75E-04 | 1.29E-05 | 0 |

|      |           |          |   |
|------|-----------|----------|---|
| 1680 | -1.84E-04 | 5.43E-06 | 0 |
| 1720 | -1.72E-04 | 5.54E-06 | 0 |
| 1760 | -1.91E-04 | 5.36E-06 | 0 |
| 1800 | -1.71E-04 | 5.09E-06 | 0 |
| 1840 | -1.92E-04 | 7.35E-06 | 0 |
| 1880 | -1.91E-04 | 6.16E-06 | 0 |
| 1920 | -1.94E-04 | 1.06E-05 | 0 |
| 1960 | -2.17E-04 | 5.70E-06 | 0 |
| 2000 | -2.02E-04 | 4.83E-06 | 0 |







## Head Pellet # 2

| Applied Magnetic Field<br>(Oe) | Average Magnetic Moment<br>(emu) | standard error<br>(emu) | # outliers<br>(>2 sigma) |
|--------------------------------|----------------------------------|-------------------------|--------------------------|
| 0                              | -5.83E-07                        | 3.06E-08                | 0                        |
| 40                             | 6.15E-06                         | 5.72E-06                | 0                        |
| 80                             | 2.70E-06                         | 1.08E-06                | 0                        |
| 120                            | 4.53E-06                         | 1.69E-06                | 0                        |
| 160                            | 8.37E-06                         | 6.54E-08                | 0                        |
| 200                            | 1.01E-05                         | 6.48E-07                | 0                        |
| 240                            | 5.08E-06                         | 7.28E-06                | 0                        |
| 280                            | 1.09E-05                         | 3.96E-06                | 0                        |
| 320                            | 1.73E-05                         | 9.07E-08                | 0                        |
| 360                            | 8.67E-06                         | 1.13E-05                | 0                        |
| 400                            | 1.48E-05                         | 5.80E-06                | 0                        |
| 440                            | 9.18E-06                         | 8.05E-06                | 0                        |
| 480                            | 1.14E-05                         | 8.87E-06                | 0                        |
| 520                            | 3.01E-05                         | 8.29E-07                | 0                        |
| 560                            | 2.31E-05                         | 8.52E-06                | 0                        |
| 600                            | 3.34E-05                         | 9.11E-07                | 0                        |
| 640                            | 3.60E-05                         | 1.20E-06                | 0                        |
| 680                            | 3.71E-05                         | 2.20E-07                | 0                        |
| 720                            | 3.95E-05                         | 1.65E-07                | 0                        |
| 760                            | 4.19E-05                         | 3.65E-08                | 0                        |
| 800                            | 3.31E-05                         | 1.23E-05                | 0                        |
| 840                            | 4.46E-05                         | 1.24E-06                | 0                        |
| 880                            | 2.28E-05                         | 2.65E-05                | 0                        |
| 920                            | 5.12E-05                         | 1.71E-06                | 0                        |
| 960                            | 5.38E-05                         | 9.42E-07                | 0                        |
| 1000                           | 5.56E-05                         | 2.87E-07                | 0                        |
| 1040                           | 5.55E-05                         | 2.51E-06                | 0                        |
| 1080                           | 6.04E-05                         | 3.01E-07                | 0                        |
| 1120                           | 6.23E-05                         | 3.05E-07                | 0                        |
| 1160                           | 6.47E-05                         | 2.02E-07                | 0                        |
| 1200                           | 6.82E-05                         | 9.06E-07                | 0                        |
| 1240                           | 9.31E-05                         | 1.29E-05                | 0                        |
| 1280                           | 6.45E-05                         | 2.58E-05                | 0                        |
| 1320                           | 7.41E-05                         | 5.27E-07                | 0                        |
| 1360                           | 3.54E-05                         | 2.53E-05                | 0                        |
| 1400                           | 8.91E-05                         | 1.51E-05                | 0                        |
| 1440                           | 5.80E-05                         | 2.25E-05                | 0                        |

|      |          |          |   |
|------|----------|----------|---|
| 1480 | 8.29E-05 | 8.76E-07 | 0 |
| 1520 | 8.51E-05 | 3.41E-07 | 0 |
| 1560 | 9.04E-05 | 9.90E-07 | 0 |
| 1600 | 1.05E-04 | 1.65E-05 | 0 |
| 1640 | 9.06E-05 | 1.47E-06 | 0 |
| 1680 | 5.91E-05 | 5.82E-05 | 0 |
| 1720 | 4.14E-05 | 5.31E-05 | 0 |
| 1760 | 7.18E-05 | 2.62E-05 | 0 |
| 1800 | 1.07E-04 | 2.17E-06 | 0 |
| 1840 | 1.04E-04 | 1.39E-06 | 0 |
| 1880 | 1.08E-04 | 1.92E-06 | 0 |
| 1920 | 8.06E-05 | 2.89E-05 | 0 |
| 1960 | 1.04E-04 | 1.02E-05 | 0 |
| 2000 | 8.18E-05 | 3.08E-05 | 0 |
| 1960 | 1.10E-04 | 1.40E-07 | 0 |
| 1920 | 1.08E-04 | 4.64E-07 | 0 |
| 1880 | 1.06E-04 | 2.05E-07 | 0 |
| 1840 | 1.03E-04 | 2.23E-08 | 0 |
| 1800 | 1.01E-04 | 2.65E-07 | 0 |
| 1760 | 9.92E-05 | 1.98E-07 | 0 |
| 1720 | 9.63E-05 | 8.87E-08 | 0 |
| 1680 | 9.42E-05 | 1.94E-08 | 0 |
| 1640 | 9.19E-05 | 7.23E-08 | 0 |
| 1600 | 8.96E-05 | 2.55E-07 | 0 |
| 1560 | 8.72E-05 | 1.72E-07 | 0 |
| 1520 | 8.54E-05 | 3.14E-07 | 0 |
| 1480 | 8.26E-05 | 4.91E-07 | 0 |
| 1440 | 8.01E-05 | 2.36E-07 | 0 |
| 1400 | 7.81E-05 | 8.24E-08 | 0 |
| 1360 | 7.57E-05 | 1.30E-07 | 0 |
| 1320 | 5.31E-05 | 1.98E-05 | 0 |
| 1280 | 7.16E-05 | 1.46E-07 | 0 |
| 1240 | 6.88E-05 | 8.40E-08 | 0 |
| 1200 | 6.65E-05 | 3.99E-08 | 0 |
| 1160 | 2.99E-05 | 2.10E-05 | 0 |
| 1120 | 2.88E-05 | 3.44E-05 | 0 |
| 1080 | 6.02E-05 | 4.45E-07 | 0 |
| 1040 | 4.20E-05 | 1.57E-05 | 0 |
| 1000 | 6.47E-05 | 9.57E-06 | 0 |
| 960  | 5.32E-05 | 2.61E-07 | 0 |
| 920  | 5.07E-05 | 7.86E-07 | 0 |

|      |           |          |   |
|------|-----------|----------|---|
| 880  | 4.84E-05  | 5.07E-07 | 0 |
| 840  | 4.60E-05  | 1.90E-07 | 0 |
| 800  | 4.37E-05  | 9.70E-08 | 0 |
| 760  | 4.24E-05  | 1.05E-06 | 0 |
| 720  | 4.58E-05  | 6.92E-06 | 0 |
| 680  | 1.71E-05  | 2.05E-05 | 0 |
| 640  | 2.63E-05  | 1.01E-05 | 0 |
| 600  | 3.16E-05  | 1.07E-06 | 0 |
| 560  | 3.06E-05  | 3.27E-07 | 0 |
| 520  | 2.80E-05  | 3.01E-07 | 0 |
| 480  | 4.38E-06  | 8.38E-06 | 0 |
| 440  | 2.35E-05  | 2.50E-07 | 0 |
| 400  | 1.60E-05  | 5.78E-06 | 0 |
| 360  | 2.30E-05  | 4.44E-06 | 0 |
| 320  | 2.03E-05  | 3.57E-06 | 0 |
| 280  | 1.29E-05  | 1.13E-06 | 0 |
| 240  | 1.29E-05  | 6.94E-07 | 0 |
| 200  | 8.85E-06  | 4.37E-07 | 0 |
| 160  | 7.12E-06  | 2.06E-07 | 0 |
| 120  | 4.53E-06  | 1.61E-06 | 0 |
| 80   | 1.57E-06  | 1.87E-06 | 0 |
| 40   | -1.92E-06 | 1.30E-06 | 0 |
| 0    | 1.04E-06  | 1.35E-06 | 0 |
| -40  | -6.15E-07 | 2.23E-06 | 0 |
| -80  | -3.62E-06 | 1.38E-06 | 0 |
| -120 | -8.17E-06 | 2.55E-07 | 0 |
| -160 | -1.04E-05 | 1.10E-07 | 0 |
| -200 | -1.20E-05 | 5.51E-08 | 0 |
| -240 | -1.45E-05 | 1.24E-07 | 0 |
| -280 | -1.13E-05 | 1.00E-05 | 0 |
| -320 | 2.14E-06  | 1.31E-05 | 0 |
| -360 | -2.09E-05 | 2.19E-06 | 0 |
| -400 | -2.53E-05 | 1.16E-06 | 0 |
| -440 | -3.45E-05 | 8.84E-06 | 0 |
| -480 | -2.63E-05 | 2.65E-06 | 0 |
| -520 | -3.54E-05 | 5.52E-06 | 0 |
| -560 | -3.28E-05 | 6.36E-07 | 0 |
| -600 | -3.40E-05 | 1.55E-06 | 0 |
| -640 | -2.19E-05 | 9.47E-06 | 0 |
| -680 | -4.31E-05 | 6.28E-06 | 0 |
| -720 | -3.04E-05 | 1.11E-05 | 0 |

|       |           |          |   |
|-------|-----------|----------|---|
| -760  | -1.85E-05 | 2.45E-05 | 0 |
| -800  | -5.31E-05 | 1.26E-05 | 0 |
| -840  | -5.00E-05 | 4.62E-06 | 0 |
| -880  | -5.11E-05 | 8.25E-07 | 0 |
| -920  | -5.35E-05 | 1.30E-06 | 0 |
| -960  | -5.58E-05 | 4.80E-07 | 0 |
| -1000 | -5.68E-05 | 5.33E-07 | 0 |
| -1040 | -5.99E-05 | 7.97E-07 | 0 |
| -1080 | -2.92E-05 | 3.37E-05 | 0 |
| -1120 | -6.14E-05 | 2.90E-06 | 0 |
| -1160 | -4.69E-05 | 1.77E-05 | 0 |
| -1200 | -6.88E-05 | 3.94E-06 | 0 |
| -1240 | -5.24E-05 | 2.05E-05 | 0 |
| -1280 | -8.92E-05 | 1.20E-05 | 0 |
| -1320 | -7.21E-05 | 1.69E-06 | 0 |
| -1360 | -8.07E-05 | 1.75E-06 | 0 |
| -1400 | -8.07E-05 | 3.05E-06 | 0 |
| -1440 | -9.55E-05 | 1.40E-05 | 0 |
| -1480 | -8.80E-05 | 3.82E-06 | 0 |
| -1520 | -9.40E-05 | 2.62E-06 | 0 |
| -1560 | -8.03E-05 | 9.17E-06 | 0 |
| -1600 | -1.22E-05 | 5.32E-05 | 0 |
| -1640 | -7.41E-05 | 2.38E-05 | 0 |
| -1680 | -8.69E-05 | 4.54E-06 | 0 |
| -1720 | -5.38E-05 | 4.97E-05 | 0 |
| -1760 | -1.19E-04 | 1.75E-05 | 0 |
| -1800 | -1.02E-04 | 6.35E-06 | 0 |
| -1840 | -1.20E-04 | 9.34E-06 | 0 |
| -1880 | -1.11E-04 | 2.91E-05 | 0 |
| -1920 | -1.12E-04 | 8.43E-06 | 0 |
| -1960 | -1.09E-04 | 7.29E-06 | 0 |
| -2000 | -1.19E-04 | 8.01E-06 | 0 |
| -1960 | -7.83E-05 | 3.15E-05 | 0 |
| -1920 | -1.09E-04 | 7.23E-07 | 0 |
| -1880 | -1.06E-04 | 5.36E-07 | 0 |
| -1840 | -1.04E-04 | 4.19E-07 | 0 |
| -1800 | -1.02E-04 | 5.82E-07 | 0 |
| -1760 | -9.94E-05 | 6.52E-07 | 0 |
| -1720 | -9.67E-05 | 6.24E-07 | 0 |
| -1680 | -9.46E-05 | 5.78E-07 | 0 |
| -1640 | -9.21E-05 | 4.12E-07 | 0 |

|       |           |          |   |
|-------|-----------|----------|---|
| -1600 | -8.99E-05 | 6.19E-07 | 0 |
| -1560 | -8.76E-05 | 3.39E-07 | 0 |
| -1520 | -8.57E-05 | 6.49E-07 | 0 |
| -1480 | -8.28E-05 | 4.55E-07 | 0 |
| -1440 | -8.13E-05 | 6.65E-07 | 0 |
| -1400 | -7.84E-05 | 5.41E-07 | 0 |
| -1360 | -7.59E-05 | 5.76E-07 | 0 |
| -1320 | -7.34E-05 | 4.04E-07 | 0 |
| -1280 | -7.15E-05 | 4.97E-07 | 0 |
| -1240 | -6.92E-05 | 5.03E-07 | 0 |
| -1200 | -5.02E-05 | 1.80E-05 | 0 |
| -1160 | -6.46E-05 | 5.17E-07 | 0 |
| -1120 | -6.24E-05 | 4.80E-07 | 0 |
| -1080 | -6.03E-05 | 8.87E-07 | 0 |
| -1040 | -5.77E-05 | 4.56E-07 | 0 |
| -1000 | -5.52E-05 | 6.71E-07 | 0 |
| -960  | -3.89E-05 | 1.41E-05 | 0 |
| -920  | -3.69E-05 | 1.36E-05 | 0 |
| -880  | -4.86E-05 | 6.42E-07 | 0 |
| -840  | -4.65E-05 | 1.30E-07 | 0 |
| -800  | -5.43E-05 | 7.90E-06 | 0 |
| -760  | -3.19E-05 | 1.19E-05 | 0 |
| -720  | -3.99E-05 | 1.24E-06 | 0 |
| -680  | -3.74E-05 | 5.43E-07 | 0 |
| -640  | -3.54E-05 | 8.07E-07 | 0 |
| -600  | -2.42E-05 | 8.79E-06 | 0 |
| -560  | -2.15E-05 | 8.13E-06 | 0 |
| -520  | -2.82E-05 | 4.59E-07 | 0 |
| -480  | -2.50E-05 | 1.47E-06 | 0 |
| -440  | -2.31E-05 | 2.82E-06 | 0 |
| -400  | -1.88E-05 | 2.09E-06 | 0 |
| -360  | -3.29E-06 | 1.12E-05 | 0 |
| -320  | -7.65E-06 | 9.82E-06 | 0 |
| -280  | -1.51E-05 | 1.04E-06 | 0 |
| -240  | -8.68E-06 | 3.48E-06 | 0 |
| -200  | -4.34E-06 | 5.58E-06 | 0 |
| -160  | -2.58E-06 | 5.98E-06 | 0 |
| -120  | -5.54E-06 | 6.69E-07 | 0 |
| -80   | -1.76E-06 | 1.67E-06 | 0 |
| -40   | -1.91E-06 | 4.41E-06 | 0 |
| 0     | -3.85E-07 | 1.10E-06 | 0 |

|      |           |          |   |
|------|-----------|----------|---|
| 40   | 3.75E-06  | 6.22E-07 | 0 |
| 80   | 5.54E-06  | 3.08E-07 | 0 |
| 120  | 1.26E-05  | 5.72E-06 | 0 |
| 160  | 1.12E-05  | 2.00E-06 | 0 |
| 200  | 8.49E-06  | 3.43E-06 | 0 |
| 240  | 1.51E-05  | 1.06E-06 | 0 |
| 280  | 1.64E-05  | 4.99E-07 | 0 |
| 320  | 1.87E-05  | 4.22E-07 | 0 |
| 360  | 2.07E-05  | 5.70E-07 | 0 |
| 400  | 2.28E-05  | 5.23E-07 | 0 |
| 440  | 7.35E-06  | 1.37E-05 | 0 |
| 480  | 1.55E-06  | 1.67E-05 | 0 |
| 520  | 2.82E-05  | 1.10E-06 | 0 |
| 560  | 3.17E-05  | 1.72E-06 | 0 |
| 600  | 1.39E-05  | 1.80E-05 | 0 |
| 640  | 3.52E-05  | 1.71E-06 | 0 |
| 680  | 3.85E-05  | 5.10E-07 | 0 |
| 720  | 4.41E-05  | 3.69E-06 | 0 |
| 760  | -9.18E-07 | 3.03E-05 | 0 |
| 800  | 4.45E-05  | 1.47E-06 | 0 |
| 840  | 4.88E-05  | 4.08E-06 | 0 |
| 880  | 5.06E-05  | 1.06E-06 | 0 |
| 920  | 5.06E-05  | 2.28E-06 | 0 |
| 960  | 5.43E-05  | 1.22E-06 | 0 |
| 1000 | 6.72E-05  | 1.09E-05 | 0 |
| 1040 | 4.40E-05  | 1.62E-05 | 0 |
| 1080 | 6.28E-05  | 2.92E-06 | 0 |
| 1120 | 4.41E-05  | 1.65E-05 | 0 |
| 1160 | 6.28E-05  | 4.40E-06 | 0 |
| 1200 | 7.10E-05  | 1.67E-06 | 0 |
| 1240 | 6.90E-05  | 1.52E-06 | 0 |
| 1280 | 8.79E-05  | 1.22E-05 | 0 |
| 1320 | 7.85E-05  | 2.93E-06 | 0 |
| 1360 | 8.95E-05  | 4.06E-06 | 0 |
| 1400 | 8.51E-05  | 9.14E-06 | 0 |
| 1440 | 4.51E-05  | 4.80E-05 | 0 |
| 1480 | 9.00E-05  | 6.74E-06 | 0 |
| 1520 | 8.47E-05  | 3.42E-06 | 0 |
| 1560 | 7.61E-05  | 9.86E-06 | 0 |
| 1600 | 9.42E-05  | 6.77E-06 | 0 |
| 1640 | 8.48E-05  | 7.97E-06 | 0 |

|      |          |          |   |
|------|----------|----------|---|
| 1680 | 1.17E-04 | 7.86E-06 | 0 |
| 1720 | 9.61E-05 | 8.33E-06 | 0 |
| 1760 | 1.11E-04 | 8.99E-06 | 0 |
| 1800 | 7.21E-05 | 2.79E-05 | 0 |
| 1840 | 1.01E-04 | 5.24E-06 | 0 |
| 1880 | 7.38E-05 | 2.90E-05 | 0 |
| 1920 | 4.47E-05 | 5.93E-05 | 0 |
| 1960 | 1.20E-04 | 1.14E-05 | 0 |







### Head Pellet # 3

| Applied Magnetic Field<br>(Oe) | Average Magnetic Moment<br>(emu) | standard error<br>(emu) | # outliers<br>(>2 sigma) |
|--------------------------------|----------------------------------|-------------------------|--------------------------|
| 0                              | 7.94E-08                         | 1.18E-07                | 0                        |
| 30                             | -1.52E-06                        | 2.19E-07                | 0                        |
| 60                             | -4.13E-06                        | 2.92E-08                | 0                        |
| 90                             | -2.96E-06                        | 3.61E-06                | 0                        |
| 119                            | -8.92E-06                        | 1.16E-07                | 0                        |
| 149                            | -1.13E-05                        | 1.59E-07                | 0                        |
| 179                            | -1.37E-05                        | 1.03E-07                | 0                        |
| 209                            | -1.61E-05                        | 4.55E-08                | 0                        |
| 239                            | -1.86E-05                        | 1.09E-07                | 0                        |
| 269                            | -2.15E-05                        | 3.91E-07                | 0                        |
| 299                            | -2.30E-05                        | 1.32E-07                | 0                        |
| 328                            | -2.53E-05                        | 4.63E-08                | 0                        |
| 358                            | -2.75E-05                        | 1.97E-07                | 0                        |
| 388                            | -3.03E-05                        | 1.52E-07                | 0                        |
| 418                            | -3.28E-05                        | 4.09E-07                | 0                        |
| 448                            | -3.50E-05                        | 5.53E-07                | 0                        |
| 478                            | -3.74E-05                        | 6.88E-08                | 0                        |
| 507                            | -3.99E-05                        | 1.99E-07                | 0                        |
| 537                            | -4.21E-05                        | 1.53E-07                | 0                        |
| 567                            | -4.47E-05                        | 2.42E-08                | 0                        |
| 597                            | -4.70E-05                        | 7.57E-08                | 0                        |
| 627                            | -4.87E-05                        | 1.31E-06                | 0                        |
| 657                            | -5.32E-05                        | 8.53E-07                | 0                        |
| 687                            | -5.54E-05                        | 4.32E-07                | 0                        |
| 716                            | -5.72E-05                        | 9.77E-08                | 0                        |
| 746                            | -5.96E-05                        | 1.52E-07                | 0                        |
| 776                            | -6.16E-05                        | 1.92E-07                | 0                        |
| 806                            | -6.44E-05                        | 2.54E-07                | 0                        |
| 836                            | -6.75E-05                        | 1.82E-07                | 0                        |
| 866                            | -6.99E-05                        | 4.95E-08                | 0                        |
| 896                            | -7.43E-05                        | 3.11E-06                | 0                        |
| 925                            | -7.61E-05                        | 4.23E-07                | 0                        |
| 955                            | -7.71E-05                        | 1.18E-06                | 0                        |
| 985                            | -8.02E-05                        | 4.33E-07                | 0                        |
| 1015                           | -8.26E-05                        | 5.10E-08                | 0                        |
| 1045                           | -8.50E-05                        | 1.72E-07                | 0                        |
| 1075                           | -8.81E-05                        | 1.17E-07                | 0                        |

|      |           |          |   |
|------|-----------|----------|---|
| 1104 | -9.06E-05 | 8.42E-08 | 0 |
| 1134 | -9.32E-05 | 1.59E-07 | 0 |
| 1164 | -9.42E-05 | 1.18E-06 | 0 |
| 1194 | -1.00E-04 | 7.22E-07 | 0 |
| 1224 | -1.01E-04 | 1.23E-06 | 0 |
| 1254 | -1.03E-04 | 2.23E-07 | 0 |
| 1284 | -1.06E-04 | 2.76E-07 | 0 |
| 1313 | -1.09E-04 | 3.72E-07 | 0 |
| 1343 | -1.12E-04 | 2.87E-07 | 0 |
| 1373 | -1.15E-04 | 1.54E-07 | 0 |
| 1403 | -1.16E-04 | 8.95E-07 | 0 |
| 1433 | -1.20E-04 | 1.70E-06 | 0 |
| 1463 | -1.24E-04 | 2.35E-06 | 0 |
| 1493 | -1.24E-04 | 1.49E-06 | 0 |
| 1522 | -1.29E-04 | 5.77E-07 | 0 |
| 1552 | -1.31E-04 | 5.71E-07 | 0 |
| 1582 | -1.33E-04 | 3.73E-07 | 0 |
| 1612 | -1.36E-04 | 2.03E-07 | 0 |
| 1642 | -1.39E-04 | 1.89E-07 | 0 |
| 1672 | -1.40E-04 | 1.04E-06 | 0 |
| 1701 | -1.44E-04 | 9.49E-07 | 0 |
| 1731 | -1.48E-04 | 1.87E-06 | 0 |
| 1761 | -1.49E-04 | 1.42E-06 | 0 |
| 1791 | -1.53E-04 | 9.01E-07 | 0 |
| 1821 | -1.55E-04 | 5.21E-07 | 0 |
| 1851 | -1.58E-04 | 6.52E-07 | 0 |
| 1881 | -1.65E-04 | 3.86E-06 | 0 |
| 1910 | -1.63E-04 | 2.80E-06 | 0 |
| 1940 | -1.69E-04 | 2.53E-06 | 0 |
| 1970 | -1.68E-04 | 2.29E-06 | 0 |
| 2000 | -1.72E-04 | 1.73E-06 | 0 |
| 2000 | -1.73E-04 | 5.03E-07 | 0 |
| 1970 | -1.68E-04 | 1.32E-06 | 0 |
| 1939 | -1.66E-04 | 7.37E-08 | 0 |
| 1909 | -1.63E-04 | 3.72E-08 | 0 |
| 1879 | -1.61E-04 | 4.91E-07 | 0 |
| 1848 | -1.58E-04 | 1.14E-07 | 0 |
| 1818 | -1.55E-04 | 1.07E-07 | 0 |
| 1788 | -1.52E-04 | 1.28E-07 | 0 |
| 1758 | -1.49E-04 | 6.42E-08 | 0 |
| 1727 | -1.46E-04 | 9.34E-08 | 0 |

|      |           |          |   |
|------|-----------|----------|---|
| 1697 | -1.44E-04 | 1.36E-07 | 0 |
| 1667 | -1.40E-04 | 1.05E-07 | 0 |
| 1636 | -1.38E-04 | 5.42E-08 | 0 |
| 1606 | -1.35E-04 | 2.38E-07 | 0 |
| 1576 | -1.32E-04 | 3.62E-07 | 0 |
| 1545 | -1.29E-04 | 1.74E-07 | 0 |
| 1515 | -1.27E-04 | 2.13E-07 | 0 |
| 1485 | -1.24E-04 | 3.07E-08 | 0 |
| 1455 | -1.21E-04 | 5.54E-08 | 0 |
| 1424 | -1.18E-04 | 1.12E-07 | 0 |
| 1394 | -1.15E-04 | 2.14E-07 | 0 |
| 1364 | -1.13E-04 | 4.28E-08 | 0 |
| 1333 | -1.09E-04 | 5.63E-07 | 0 |
| 1303 | -1.07E-04 | 5.05E-07 | 0 |
| 1273 | -1.05E-04 | 5.19E-07 | 0 |
| 1242 | -1.02E-04 | 2.11E-07 | 0 |
| 1212 | -9.90E-05 | 8.47E-08 | 0 |
| 1182 | -9.59E-05 | 5.56E-07 | 0 |
| 1152 | -9.37E-05 | 2.18E-07 | 0 |
| 1121 | -9.08E-05 | 1.27E-07 | 0 |
| 1091 | -8.81E-05 | 4.49E-08 | 0 |
| 1061 | -8.29E-05 | 3.20E-06 | 0 |
| 1030 | -8.25E-05 | 7.71E-07 | 0 |
| 1000 | -8.08E-05 | 5.80E-07 | 0 |
| 970  | -7.81E-05 | 8.72E-07 | 0 |
| 939  | -7.52E-05 | 1.17E-07 | 0 |
| 909  | -7.23E-05 | 3.56E-07 | 0 |
| 879  | -6.98E-05 | 1.82E-07 | 0 |
| 848  | -6.64E-05 | 7.77E-08 | 0 |
| 818  | -6.39E-05 | 1.71E-07 | 0 |
| 788  | -6.11E-05 | 1.03E-06 | 0 |
| 758  | -4.07E-05 | 2.01E-05 | 0 |
| 727  | -5.74E-05 | 8.89E-07 | 0 |
| 697  | -5.45E-05 | 1.49E-07 | 0 |
| 667  | -5.13E-05 | 3.68E-07 | 0 |
| 636  | -4.91E-05 | 3.14E-07 | 0 |
| 606  | -4.55E-05 | 1.13E-07 | 0 |
| 576  | -4.29E-05 | 6.37E-08 | 0 |
| 545  | -4.05E-05 | 1.46E-06 | 0 |
| 515  | -1.17E-05 | 1.62E-05 | 0 |
| 485  | -2.31E-05 | 1.42E-05 | 0 |

|      |           |          |   |
|------|-----------|----------|---|
| 455  | -3.44E-05 | 9.59E-07 | 0 |
| 424  | -3.02E-05 | 2.26E-07 | 0 |
| 394  | -2.86E-05 | 1.52E-07 | 0 |
| 364  | -2.49E-05 | 1.46E-07 | 0 |
| 333  | -2.26E-05 | 6.21E-08 | 0 |
| 303  | -1.49E-05 | 7.49E-06 | 0 |
| 273  | -1.26E-05 | 6.52E-06 | 0 |
| 242  | -6.74E-06 | 9.07E-06 | 0 |
| 212  | -1.37E-05 | 6.76E-07 | 0 |
| 182  | -1.10E-05 | 1.87E-07 | 0 |
| 152  | -9.43E-06 | 2.12E-07 | 0 |
| 121  | -6.41E-06 | 1.31E-07 | 0 |
| 91   | -3.65E-06 | 1.49E-07 | 0 |
| 61   | -8.77E-07 | 5.31E-07 | 0 |
| 30   | 1.93E-06  | 7.64E-07 | 0 |
| 0    | 2.34E-06  | 1.18E-06 | 0 |
| 0    | -2.98E-08 | 1.39E-06 | 0 |
| -30  | 5.82E-07  | 2.33E-06 | 0 |
| -60  | 7.38E-06  | 2.43E-07 | 0 |
| -90  | 8.68E-06  | 7.90E-07 | 0 |
| -119 | -4.75E-07 | 5.01E-06 | 0 |
| -149 | 1.25E-05  | 7.15E-06 | 0 |
| -179 | 6.31E-06  | 8.99E-06 | 0 |
| -209 | 1.85E-05  | 2.67E-06 | 0 |
| -239 | 1.38E-05  | 6.65E-06 | 0 |
| -269 | 1.49E-05  | 7.59E-06 | 0 |
| -299 | 1.55E-05  | 8.57E-06 | 0 |
| -328 | 1.70E-05  | 9.49E-06 | 0 |
| -388 | 2.83E-05  | 4.25E-06 | 0 |
| -418 | 3.32E-05  | 9.57E-07 | 0 |
| -448 | 3.62E-05  | 8.61E-07 | 0 |
| -478 | 3.50E-05  | 4.41E-06 | 0 |
| -507 | 3.75E-05  | 8.74E-07 | 0 |
| -537 | 2.64E-05  | 1.42E-05 | 0 |
| -567 | 4.53E-05  | 3.01E-07 | 0 |
| -597 | 4.76E-05  | 3.85E-07 | 0 |
| -627 | 4.97E-05  | 7.48E-07 | 0 |
| -657 | 5.16E-05  | 8.75E-07 | 0 |
| -687 | 3.56E-05  | 1.91E-05 | 0 |
| -716 | 5.51E-05  | 5.35E-07 | 0 |
| -746 | 6.10E-05  | 6.41E-07 | 0 |

|       |          |          |   |
|-------|----------|----------|---|
| -776  | 6.32E-05 | 4.14E-07 | 0 |
| -806  | 6.49E-05 | 8.42E-07 | 0 |
| -836  | 2.39E-05 | 3.07E-05 | 0 |
| -866  | 7.01E-05 | 3.99E-07 | 0 |
| -896  | 7.09E-05 | 1.58E-06 | 0 |
| -925  | 7.70E-05 | 2.12E-06 | 0 |
| -955  | 7.79E-05 | 8.30E-07 | 0 |
| -985  | 8.71E-05 | 6.38E-06 | 0 |
| -1015 | 8.11E-05 | 1.02E-06 | 0 |
| -1045 | 7.78E-05 | 3.02E-06 | 0 |
| -1075 | 8.57E-05 | 3.08E-07 | 0 |
| -1104 | 8.99E-05 | 7.52E-07 | 0 |
| -1134 | 9.34E-05 | 5.52E-07 | 0 |
| -1164 | 9.48E-05 | 2.12E-06 | 0 |
| -1194 | 9.36E-05 | 2.90E-06 | 0 |
| -1224 | 9.41E-05 | 4.12E-06 | 0 |
| -1254 | 1.04E-04 | 1.81E-06 | 0 |
| -1284 | 1.25E-04 | 1.62E-05 | 0 |
| -1313 | 1.09E-04 | 2.58E-06 | 0 |
| -1343 | 1.11E-04 | 7.89E-07 | 0 |
| -1373 | 1.14E-04 | 1.38E-06 | 0 |
| -1403 | 1.13E-04 | 2.31E-06 | 0 |
| -1433 | 1.06E-04 | 1.36E-05 | 0 |
| -1463 | 8.39E-05 | 4.39E-05 | 0 |
| -1493 | 1.20E-04 | 3.86E-06 | 0 |
| -1522 | 1.25E-04 | 1.57E-06 | 0 |
| -1552 | 1.29E-04 | 1.44E-06 | 0 |
| -1582 | 1.35E-04 | 1.46E-06 | 0 |
| -1612 | 1.23E-04 | 1.76E-05 | 0 |
| -1642 | 1.28E-04 | 8.85E-06 | 0 |
| -1672 | 1.47E-04 | 6.35E-06 | 0 |
| -1701 | 1.35E-04 | 6.13E-06 | 0 |
| -1731 | 1.45E-04 | 1.08E-06 | 0 |
| -1761 | 9.90E-05 | 4.99E-05 | 0 |
| -1791 | 1.26E-04 | 1.56E-05 | 0 |
| -1821 | 4.70E-05 | 7.04E-05 | 0 |
| -1851 | 1.50E-04 | 4.48E-06 | 0 |
| -1881 | 1.02E-04 | 5.81E-05 | 0 |
| -1910 | 1.54E-04 | 3.49E-06 | 0 |
| -1940 | 1.70E-04 | 3.72E-06 | 0 |
| -1970 | 1.76E-04 | 9.75E-06 | 0 |

|       |          |          |   |
|-------|----------|----------|---|
| -2000 | 1.12E-04 | 5.63E-05 | 0 |
| -2000 | 1.58E-04 | 2.68E-05 | 0 |
| -1970 | 1.68E-04 | 3.48E-08 | 0 |
| -1940 | 1.65E-04 | 1.66E-07 | 0 |
| -1910 | 1.63E-04 | 8.46E-09 | 0 |
| -1881 | 1.59E-04 | 1.68E-06 | 0 |
| -1851 | 1.57E-04 | 3.68E-07 | 0 |
| -1821 | 1.54E-04 | 2.52E-07 | 0 |
| -1791 | 1.52E-04 | 3.96E-08 | 0 |
| -1761 | 1.49E-04 | 1.60E-07 | 0 |
| -1731 | 1.46E-04 | 1.60E-07 | 0 |
| -1701 | 1.43E-04 | 3.94E-08 | 0 |
| -1672 | 1.41E-04 | 1.14E-07 | 0 |
| -1642 | 1.38E-04 | 9.91E-08 | 0 |
| -1612 | 1.35E-04 | 1.96E-07 | 0 |
| -1582 | 1.33E-04 | 7.81E-08 | 0 |
| -1552 | 1.30E-04 | 4.36E-08 | 0 |
| -1522 | 1.27E-04 | 5.60E-08 | 0 |
| -1493 | 1.24E-04 | 1.10E-07 | 0 |
| -1463 | 1.21E-04 | 1.40E-07 | 0 |
| -1433 | 1.19E-04 | 2.10E-08 | 0 |
| -1403 | 1.15E-04 | 7.15E-07 | 0 |
| -1373 | 1.13E-04 | 5.84E-07 | 0 |
| -1343 | 1.11E-04 | 3.88E-07 | 0 |
| -1313 | 1.08E-04 | 4.62E-07 | 0 |
| -1284 | 1.05E-04 | 4.63E-08 | 0 |
| -1254 | 1.03E-04 | 1.29E-07 | 0 |
| -1224 | 9.97E-05 | 1.14E-07 | 0 |
| -1194 | 9.74E-05 | 8.67E-08 | 0 |
| -1164 | 9.45E-05 | 2.91E-08 | 0 |
| -1134 | 9.15E-05 | 2.86E-07 | 0 |
| -1104 | 8.89E-05 | 6.64E-07 | 0 |
| -1075 | 8.66E-05 | 8.40E-07 | 0 |
| -1045 | 8.40E-05 | 1.64E-07 | 0 |
| -1015 | 8.14E-05 | 8.12E-08 | 0 |
| -985  | 7.86E-05 | 7.60E-08 | 0 |
| -955  | 7.61E-05 | 7.39E-08 | 0 |
| -925  | 7.36E-05 | 3.03E-07 | 0 |
| -896  | 7.01E-05 | 3.08E-07 | 0 |
| -866  | 6.93E-05 | 5.99E-07 | 0 |
| -836  | 6.58E-05 | 3.40E-07 | 0 |



|      |           |          |   |
|------|-----------|----------|---|
| -806 | 6.38E-05  | 3.53E-07 | 0 |
| -776 | 6.05E-05  | 4.17E-07 | 0 |
| -746 | 5.78E-05  | 2.31E-07 | 0 |
| -716 | 5.54E-05  | 1.60E-07 | 0 |
| -687 | 5.32E-05  | 7.75E-07 | 0 |
| -657 | 4.31E-05  | 5.66E-06 | 0 |
| -627 | 4.78E-05  | 4.39E-07 | 0 |
| -597 | 4.58E-05  | 2.64E-07 | 0 |
| -567 | 4.51E-05  | 1.21E-06 | 0 |
| -537 | 3.99E-05  | 1.99E-07 | 0 |
| -507 | 3.76E-05  | 3.92E-07 | 0 |
| -478 | 3.38E-05  | 5.61E-07 | 0 |
| -448 | 1.23E-05  | 1.43E-05 | 0 |
| -418 | 1.98E-05  | 1.01E-05 | 0 |
| -388 | 2.84E-05  | 1.04E-06 | 0 |
| -358 | 2.55E-05  | 3.38E-07 | 0 |
| -328 | 1.34E-05  | 9.51E-06 | 0 |
| -299 | 2.03E-05  | 1.50E-07 | 0 |
| -269 | 1.79E-05  | 7.73E-08 | 0 |
| -239 | 6.28E-06  | 8.88E-06 | 0 |
| -209 | 6.10E-06  | 6.39E-06 | 0 |
| -179 | 9.16E-06  | 4.80E-06 | 0 |
| -149 | 9.94E-06  | 1.99E-07 | 0 |
| -119 | 6.79E-06  | 2.63E-07 | 0 |
| -90  | 7.50E-07  | 1.57E-06 | 0 |
| -60  | 6.92E-06  | 6.53E-06 | 0 |
| -30  | 1.60E-06  | 1.30E-06 | 0 |
| 0    | -4.33E-06 | 1.12E-06 | 0 |
| 0    | -1.73E-06 | 9.83E-07 | 0 |
| 30   | 2.64E-06  | 1.88E-06 | 0 |
| 60   | -5.84E-06 | 6.49E-07 | 0 |
| 90   | -8.95E-06 | 1.17E-07 | 0 |
| 119  | -1.37E-05 | 1.69E-06 | 0 |
| 149  | -1.47E-05 | 1.21E-06 | 0 |
| 179  | -1.60E-05 | 1.96E-07 | 0 |
| 209  | -1.79E-05 | 1.06E-06 | 0 |
| 239  | -1.67E-05 | 2.05E-06 | 0 |
| 269  | -2.19E-05 | 3.43E-08 | 0 |
| 299  | -2.51E-05 | 6.16E-07 | 0 |
| 328  | -2.58E-05 | 2.83E-07 | 0 |
| 358  | -2.80E-05 | 4.16E-07 | 0 |

|      |           |          |   |
|------|-----------|----------|---|
| 388  | -2.42E-05 | 1.48E-05 | 0 |
| 418  | -3.33E-05 | 2.50E-07 | 0 |
| 448  | -3.60E-05 | 2.76E-07 | 0 |
| 478  | -3.77E-05 | 3.10E-07 | 0 |
| 507  | -3.86E-05 | 1.64E-07 | 0 |
| 537  | -4.16E-05 | 6.18E-08 | 0 |
| 567  | -4.46E-05 | 9.41E-08 | 0 |
| 597  | -4.55E-05 | 1.07E-06 | 0 |
| 627  | -5.02E-05 | 3.00E-07 | 0 |
| 657  | -5.42E-05 | 5.79E-06 | 0 |
| 687  | -5.44E-05 | 1.50E-07 | 0 |
| 716  | -5.66E-05 | 1.26E-07 | 0 |
| 746  | -5.86E-05 | 2.12E-06 | 0 |
| 776  | -6.22E-05 | 1.06E-06 | 0 |
| 806  | -6.28E-05 | 1.37E-06 | 0 |
| 836  | -6.70E-05 | 1.51E-06 | 0 |
| 866  | -6.97E-05 | 1.53E-06 | 0 |
| 896  | -7.18E-05 | 1.06E-07 | 0 |
| 925  | -7.39E-05 | 2.61E-07 | 0 |
| 955  | -7.65E-05 | 2.46E-06 | 0 |
| 985  | -8.14E-05 | 1.31E-06 | 0 |
| 1015 | -8.22E-05 | 8.11E-07 | 0 |
| 1045 | -8.35E-05 | 4.95E-07 | 0 |
| 1075 | -8.70E-05 | 7.73E-07 | 0 |
| 1104 | -8.93E-05 | 4.47E-07 | 0 |
| 1134 | -6.14E-05 | 3.11E-05 | 0 |
| 1164 | -9.54E-05 | 2.99E-06 | 0 |
| 1194 | -1.01E-04 | 5.83E-07 | 0 |
| 1224 | -1.01E-04 | 2.13E-06 | 0 |
| 1254 | -1.06E-04 | 1.43E-06 | 0 |
| 1284 | -1.03E-04 | 4.19E-06 | 0 |
| 1313 | -1.08E-04 | 1.37E-06 | 0 |
| 1343 | -1.21E-04 | 2.72E-06 | 0 |
| 1373 | -4.26E-05 | 5.12E-05 | 0 |
| 1403 | -1.19E-04 | 3.06E-06 | 0 |
| 1433 | -1.17E-04 | 2.55E-06 | 0 |
| 1463 | -1.22E-04 | 2.70E-06 | 0 |
| 1493 | -7.11E-05 | 4.52E-05 | 0 |
| 1522 | -1.21E-04 | 1.84E-05 | 0 |
| 1552 | -8.86E-05 | 4.02E-05 | 0 |
| 1582 | -1.36E-04 | 2.72E-06 | 0 |

|      |           |          |   |
|------|-----------|----------|---|
| 1612 | -1.31E-04 | 4.13E-06 | 0 |
| 1642 | -1.37E-04 | 1.66E-06 | 0 |
| 1672 | -1.43E-04 | 3.19E-06 | 0 |
| 1701 | -1.21E-04 | 1.10E-05 | 0 |
| 1731 | -1.44E-04 | 8.53E-06 | 0 |
| 1761 | -1.28E-04 | 1.84E-05 | 0 |
| 1791 | -1.54E-04 | 6.30E-06 | 0 |
| 1821 | -9.80E-05 | 5.24E-05 | 0 |
| 1851 | -1.60E-04 | 4.83E-06 | 0 |
| 1881 | -1.75E-04 | 1.33E-05 | 0 |
| 1910 | -1.53E-04 | 8.84E-06 | 0 |
| 1940 | -1.63E-04 | 3.18E-06 | 0 |
| 1970 | -1.69E-04 | 3.58E-06 | 0 |
| 2000 | -1.64E-04 | 4.89E-06 | 0 |
