# Supplementary material for: Linking magnetite in the abdomen of honey bees to a magnetoreceptive function
Source: PubMed Central journal article supplement (PMC5378088; doi:10.1098/rspb.2016.2873), 2017-03-22
Supplement: rspb20162873supp4.pdf [file rspb20162873supp4.pdf]

| Bee Group<br>non-mag-bees | 1 Moment  | 2 Moment  |
|---------------------------|-----------|-----------|
| S1                        | 5.42E-09  | -1.14E-08 |
| S2                        | -1.75E-08 | -2.71E-08 |
| S3                        | -1.42E-09 | -4.15E-09 |
| S4                        | -9.35E-09 | 1.17E-08  |
| S5                        | -7.97E-09 | -1.03E-08 |
| S6                        | 5.36E-09  | 4.90E-09  |
| S7                        | 4.19E-10  | 5.30E-10  |
| S8                        | 2.77E-09  | 2.29E-09  |
| S29                       | 3.09E-09  | -2.24E-09 |
| S30                       | 7.69E-09  | 1.24E-09  |
| S32                       | 1.24E-09  | 4.25E-09  |
| S38                       | -1.35E-09 | 2.04E-09  |
| S39                       | -3.51E-10 | -4.41E-09 |
| S40                       | 2.92E-09  | 3.46E-09  |
| S41                       | 6.36E-09  | 5.86E-09  |

| Bee Group<br>mag-bees | 1 Moment  | 2 Moment  |
|-----------------------|-----------|-----------|
| S9                    | 2.54E-08  | 2.62E-08  |
| S10                   | -2.01E-08 | -2.26E-08 |
| S11                   | 4.03E-08  | 3.24E-08  |
| S12                   | 8.42E-09  | 1.43E-08  |
| S31                   | 4.23E-08  | 4.69E-08  |
| S33                   | -2.22E-08 | -2.25E-08 |
| S34                   | 3.95E-08  | 2.92E-08  |
| S35                   | -5.45E-08 | -5.50E-08 |
| S36                   | 1.22E-08  | 2.10E-08  |
| S37                   | 3.46E-08  | 5.05E-08  |
| S42                   | 1.57E-08  | 1.95E-08  |
