# Supplementary material for: Linking magnetite in the abdomen of honey bees to a magnetoreceptive function
Source: PubMed Central journal article supplement (PMC5378088; doi:10.1098/rspb.2016.2873), 2017-03-22
Supplement: rspb20162873supp5.pdf [file rspb20162873supp5.pdf]

| Date data taken | Bee - Name | Bee Group   | Choice to         |
|-----------------|------------|-------------|-------------------|
| 20-Jul          | y19        | non-mag-bee | No Magentic field |
| 22-Jul          | y10        | non-mag-bee | Magnetic field    |
| 23-Jul          | b23        | non-mag-bee | No Magentic field |
| 24-Jul          | w10        | non-mag-bee | Magnetic field    |
| 25-Jul          | w16        | non-mag-bee | Magnetic field    |
| 26-Jul          | p50        | non-mag-bee | Magnetic field    |
| 27-Jul          | b27        | non-mag-bee | No Magentic field |
| 28-Jul          | p25        | non-mag-bee | Magnetic field    |
| 29-Jul          | p31        | non-mag-bee | Magnetic field    |
| 30-Jul          | b16        | non-mag-bee | Magnetic field    |
| 31-Jul          | p23        | non-mag-bee | No Magentic field |
| 01-Aug          | w21        | non-mag-bee | Magnetic field    |
| 01-Aug          | w21        | non-mag-bee | Magnetic field    |
| 06-Aug          | b37        | non-mag-bee | Magnetic field    |
| 07-Aug          | b43        | non-mag-bee | Magnetic field    |
| 07-Aug          | g79        | non-mag-bee | Magnetic field    |
| 08-Aug          | p48        | non-mag-bee | Magnetic field    |
| 08-Aug          | w42        | non-mag-bee | No Magentic field |
| 14-Aug          | b59        | non-mag-bee | Magnetic field    |
| 17-Aug          | w54        | non-mag-bee | Magnetic field    |
| 20-Aug          | y56        | non-mag-bee | Magnetic field    |

| Date data taken | Bee - Name | Bee Group | Choice to         |
|-----------------|------------|-----------|-------------------|
| 16-Jul          | p63        | mag-bee   | Magnetic field    |
| 16-Jul          | w8         | mag-bee   | Magnetic field    |
| 18-Jul          | p13        | mag-bee   | Magnetic field    |
| 18-Jul          | p21        | mag-bee   | No Magentic field |
| 19-Jul          | g85        | mag-bee   | Magnetic field    |
| 19-Jul          | y14        | mag-bee   | Magnetic field    |
| 20-Jul          | b21        | mag-bee   | Magnetic field    |
| 22-Jul          | p26        | mag-bee   | No Magentic field |
| 23-Jul          | p30        | mag-bee   | No Magentic field |
| 24-Jul          | y20        | mag-bee   | No Magentic field |
| 25-Jul          | g91        | mag-bee   | Magnetic field    |
| 26-Jul          | p45        | mag-bee   | No Magentic field |
| 27-Jul          | y23        | mag-bee   | No Magentic field |
| 28-Jul          | w6         | mag-bee   | No Magentic field |
| 29-Jul          | g68        | mag-bee   | Magnetic field    |
| 30-Jul          | b28        | mag-bee   | Magnetic field    |

|        |     |         |                   |
|--------|-----|---------|-------------------|
| 31-Jul | b35 | mag-bee | No Magentic field |
| 01-Aug | p62 | mag-bee | Magnetic field    |
| 01-Aug | p62 | mag-bee | Magnetic field    |
| 06-Aug | p46 | mag-bee | No Magentic field |
| 06-Aug | b40 | mag-bee | No Magentic field |
| 07-Aug | y37 | mag-bee | Magnetic field    |
| 07-Aug | p43 | mag-bee | No Magentic field |
| 08-Aug | g88 | mag-bee | Magnetic field    |
| 08-Aug | b52 | mag-bee | No Magentic field |
| 11-Aug | p54 | mag-bee | Magnetic field    |
| 14-Aug | y51 | mag-bee | No Magentic field |
| 17-Aug | b47 | mag-bee | Magnetic field    |
| 20-Aug | p60 | mag-bee | No Magentic field |

| <b>Choices summerized</b> | Magnetic field | No Magentic field |
|---------------------------|----------------|-------------------|
| non-mag-bee (n=21)        | 16             | 5                 |
| mag-bee (n=29)            | 15             | 14                |
